# Supplementary material for: Effect of NH3 and HCOOH on the H2O2 + HO → HO2 + H2O reaction in the troposphere: competition between the one-step and stepwise mechanisms
Source: Royal Society of Chemistry journal article supplement (doi:10.1039/d0ra00024h), 2020-01-01
Supplement: d0ra00024h1.pdf [file d0ra00024h1.pdf]

1 **Effect of NH<sub>3</sub> and HCOOH on H<sub>2</sub>O<sub>2</sub> + HO → HO<sub>2</sub> + H<sub>2</sub>O reaction in**  
2 **the troposphere: competition between one-step and stepwise**  
3 **mechanism**

4 **Tianlei Zhang<sup>a,c,\*</sup>, Mingjie Wen<sup>a,c,#</sup>, Zhaopeng Zeng<sup>a,#</sup>, Yousong Lu<sup>b,#</sup>, Yan**  
5 **Wang<sup>a,#</sup>, Wei Wang<sup>a</sup>, Xianzhao Shao<sup>a,\*</sup>, Zhiyin Wang<sup>a</sup>, Lily Makroni<sup>b,\*</sup>**

6 <sup>a</sup> Shaanxi Key Laboratory of Catalysis, School of Chemical & Environment Science, Shaanxi  
7 University of Technology, Hanzhong, Shaanxi 723001, P. R. China;

8 <sup>b</sup> Key Laboratory for Macromolecular Science of Shaanxi Province, School of Chemistry &  
9 Chemical Engineering, Shaanxi Normal University, Xi'an, Shaanxi 710062, P. R. China;

10 <sup>c</sup> Shanghai Key Laboratory of Molecular Catalysis and Innovative Materials, Fudan University,  
11 Shanghai 200433, P. R. China.

12

| S. NO | Caption                                                                                                                                                                                                                                                                                                                                                                                 |
|-------|-----------------------------------------------------------------------------------------------------------------------------------------------------------------------------------------------------------------------------------------------------------------------------------------------------------------------------------------------------------------------------------------|
| 2     | <b>Table S1</b> Energy barriers ( $\Delta E$ ) for the H <sub>2</sub> O <sub>2</sub> + HO → HO <sub>2</sub> + H <sub>2</sub> O reaction at different theoretical methods with zero-point correction involved and unsigned error (UE) (in kcal·mol <sup>-1</sup> )                                                                                                                       |
| 3     | <b>Fig. S1</b> Schematic potential energy diagrams for the H <sub>2</sub> O <sub>2</sub> + HO → HO <sub>2</sub> + H <sub>2</sub> O reaction without and with H <sub>2</sub> O at the CCSD(T)-F12a/cc-pVDZ-F12//M06-2X/aug-cc-pVTZ level                                                                                                                                                 |
| 4     | <b>Fig. S2</b> Schematic potential energy diagrams for less favorable channels involved in HCOOH catalyzed H <sub>2</sub> O <sub>2</sub> + HO → HO <sub>2</sub> + H <sub>2</sub> O reaction at the CCSD(T)-F12a/cc-pVDZ-F12//M06-2X/aug-cc-pVTZ level                                                                                                                                   |
| 5     | <b>Fig. S3</b> Optimized geometries of all complexes for the H <sub>2</sub> O <sub>2</sub> + HO → HO <sub>2</sub> + H <sub>2</sub> O reaction with acidic (HCOOH) and basic (NH <sub>3</sub> ) catalysts at the M06-2X/aug-cc-pVTZ level of theory                                                                                                                                      |
| 6     | <b>Table S2</b> Relative energies ( $\Delta E$ ), ( $\Delta E + ZPE$ ), enthalpies ( $\Delta H$ ) and free energies ( $\Delta G$ ) for the possible stable complexes between H <sub>2</sub> O <sub>2</sub> (or HO) and the catalyst $X$ ( $X = \text{NH}_3$ and HCOOH) at the CCSD(T)-F12a/cc-pVDZ-F12//M06-2X/aug-cc-pVTZ level                                                        |
| 7     | <b>Table S3</b> Equilibrium constants (cm <sup>3</sup> ·molecule <sup>-1</sup> ) for the formation of two-body complexes between H <sub>2</sub> O <sub>2</sub> (or HO) and catalyst $X$ ( $X = \text{NH}_3$ and HCOOH) within the temperature range of 213-320 K                                                                                                                        |
| 8     | <b>Table S4</b> Equilibrium constants (cm <sup>3</sup> ·molecule <sup>-1</sup> ) for three-body complexes constituted by H <sub>2</sub> O <sub>2</sub> , HO and catalyst $X$ ( $X = \text{NH}_3$ and HCOOH) within the temperature range of 213-320 K                                                                                                                                   |
| 9     | <b>Fig. S4</b> Optimized geometries for NH <sub>3</sub> catalyzed H <sub>2</sub> O <sub>2</sub> + HO → HO <sub>2</sub> + H <sub>2</sub> O reaction at the M06-2X/aug-cc-pVTZ level                                                                                                                                                                                                      |
| 10    | <b>Fig. S5</b> Optimized geometries for HCOOH catalyzed H <sub>2</sub> O <sub>2</sub> + HO → HO <sub>2</sub> + H <sub>2</sub> O reaction at the M06-2X/aug-cc-pVTZ level                                                                                                                                                                                                                |
| 11-12 | <b>Table S5</b> Relative energies ( $\Delta E$ ), ( $\Delta E + ZPE$ ), enthalpies ( $\Delta H$ ), and free energies for the reactants, intermediate, and transition states involved in the H <sub>2</sub> O <sub>2</sub> + HO → HO <sub>2</sub> + H <sub>2</sub> O reaction with catalyst $X$ ( $X = \text{NH}_3$ and HCOOH) at the CCSD(T)-F12a/cc-pVDZ-F12//M06-2X/aug-cc-pVTZ level |
| 13    | <b>Table S6</b> Calculated rate coefficients (cm <sup>3</sup> ·molecules <sup>-1</sup> ·s <sup>-1</sup> ) for the H <sub>2</sub> O <sub>2</sub> + HO → HO <sub>2</sub> + H <sub>2</sub> O reaction in the presence of catalyst $X$ ( $X = \text{NH}_3$ and HCOOH) within the temperature range of 213-320 K                                                                             |
| 14    | <b>Table S7</b> Effective rate coefficients ( $k_1'$ ) (cm <sup>3</sup> ·molecules <sup>-1</sup> ·s <sup>-1</sup> ) for the H <sub>2</sub> O <sub>2</sub> + HO → HO <sub>2</sub> + H <sub>2</sub> O reaction with basic (NH <sub>3</sub> ) and acidic (HCOOH) catalysts within the temperature range of 280-320 K                                                                       |
| 15    | <b>Table S8</b> Concentrations of $X$ ( $X = \text{H}_2\text{O}$ , NH <sub>3</sub> , and HCOOH) (in molecule·cm <sup>-3</sup> ) within the temperature range of 280-320 K at 0 km altitude                                                                                                                                                                                              |
| 16-21 | <b>Table S9</b> Coordinates and geometrical structures for the reactants, pre-reactive complexes, transition states, post-reactive complexes and products involved in catalyst $X$ ( $X = \text{NH}_3$ and HCOOH) assisted H <sub>2</sub> O <sub>2</sub> + HO → HO <sub>2</sub> + H <sub>2</sub> O reaction at the M06-2X/aug-cc-pVTZ level                                             |

\* Corresponding authors. Tel: +86-0916-2641083, Fax: +86-0916-2641083.

E-mail: ztianlei88@l63.com (T. L. Zhang); xianzhaoshao@snut.edu.cn (X. Z. Shao); lilymakroni@gmail.com (L. Makroni).

# Mingjie Wen, Zhaopeng Zeng, Yousong Lu and Yan Wang are contributed equally to this work.

1 **Table S1** Energy barriers ( $\Delta E$ ) for the  $\text{H}_2\text{O}_2 + \text{HO} \rightarrow \text{HO}_2 + \text{H}_2\text{O}$  reaction at different theoretical  
2 methods with zero-point correction involved and unsigned error (UE) (in  $\text{kcal}\cdot\text{mol}^{-1}$ )

| Methods                                   | $\Delta E^a$ | $\Delta E^b$ | $\Delta E^c$ | UE   |
|-------------------------------------------|--------------|--------------|--------------|------|
| W3X-l//M06-2X/aug-cc-pVTZ                 | -13.4        | 2.7          | -35.1        | 0.00 |
| W2X//M06-2X/aug-cc-pVTZ                   | -13.2        | 3.2          | -35.0        | 0.26 |
| CCSD(T)-F12a/pVDZ-F12//M06-2X/aug-cc-pVTZ | -13.7        | 2.6          | -35.4        | 0.23 |

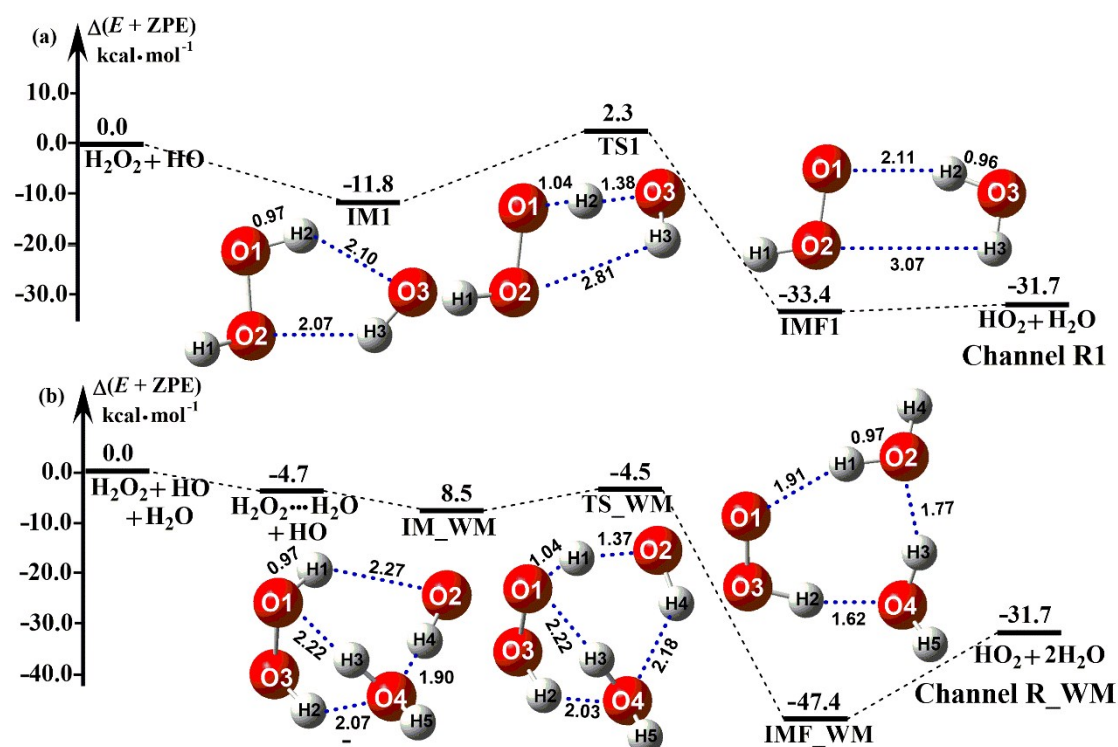

**Fig. S1** Schematic potential energy diagrams for the  $\text{H}_2\text{O}_2 + \text{HO} \rightarrow \text{HO}_2 + \text{H}_2\text{O}$  reaction without and with  $\text{H}_2\text{O}$  at the CCSD(T)-F12a/cc-pVDZ-F12//M06-2X/aug-cc-pVTZ level

The  $\text{H}_2\text{O}_2 + \text{HO} \rightarrow \text{HO}_2 + \text{H}_2\text{O}$  reaction were investigated theoretically in the previous reports.<sup>1-6</sup> In this study, we have reinvestigated this reaction at the CCSD(T)-F12a/cc-pVDZ - F12//M06-2X/aug-cc-pVTZ level in order to confirm the catalytic effect of catalyst  $X$  ( $X = \text{NH}_3$  and  $\text{HCOOH}$ ). As seen, beginning with  $\text{H}_2\text{O}_2 + \text{HO}$  reactants, five-membered ring ( $\text{O}_2 \cdots \text{H}_3\text{-O}_3 \cdots \text{H}_2\text{-O}_1$ ) complex IM1 has been formed with two weak hydrogen bonds involved. The stabilization energy of IM1 is  $11.8 \text{ kcal}\cdot\text{mol}^{-1}$ . After complex IM1, the reaction proceeded via H-abstraction transition state TS1 to form the post-reactive complex IMF1. From an energetic standpoint, transition state TS1 was predicted to be  $2.3 \text{ kcal}\cdot\text{mol}^{-1}$  above the reactants, which was slightly different from the corresponding value ( $1.5 \text{ kcal}\cdot\text{mol}^{-1}$ ) obtained by our previous result. The complex IMF1 then dissociates to produce the final products  $\text{H}_2\text{O} + \text{HO}_2$ , which lies  $31.7 \text{ kcal}\cdot\text{mol}^{-1}$  below the energy of  $\text{H}_2\text{O}_2 + \text{HO}$  reactants.

- [1] G. L. Vaghjiani, A. R. Ravishankara and N. Cohen, *J. Phys. Chem.*, 1989, **93**, 7833-7837.
- [2] F. Atadinc, H. Günaydin, A. S. Özen and V. Aviyente, *Int. J. Chem. Kinet.*, 2005, **37**, 502-514.
- [3] R. R. Baldwin and R. W. Walker, *J. Chem. Soc. Faraday T.*, 1979, **75**, 140-154.
- [4] P. H. Wine, D. H. Semmes and A. R. Ravishankara, *J. Chem. Phys.*, 1981, **75**, 4390-4395.
- [5] R. J. Buszek, M. Torrent-Sucarrat, J. M. Anglada and J. S. Francisco, *J. Phys. Chem. A*, 2012, **116**, 5821.
- [6] T. L. Zhang, X. G. Lan, Y. H. Zhang, R. Wang, Y. Q. Zhang, Z. Y. Qiao and N. Li, *Mol. Phys.*, 2019, **117**, 516-530.

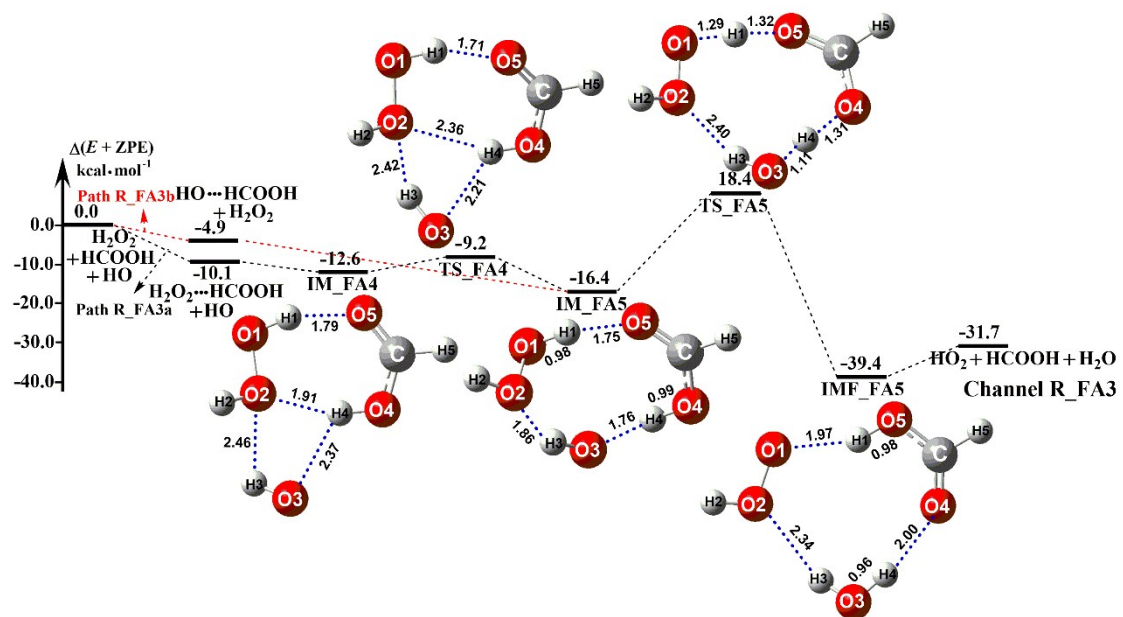

**Fig. S2** Schematic potential energy diagrams for less favorable channels involved in HCOOH catalyzed  $\text{H}_2\text{O}_2 + \text{HO} \rightarrow \text{HO}_2 + \text{H}_2\text{O}$  reaction at the CCSD(T)-F12a/cc-pVDZ-F12//M06-2X /aug-cc-pVTZ level

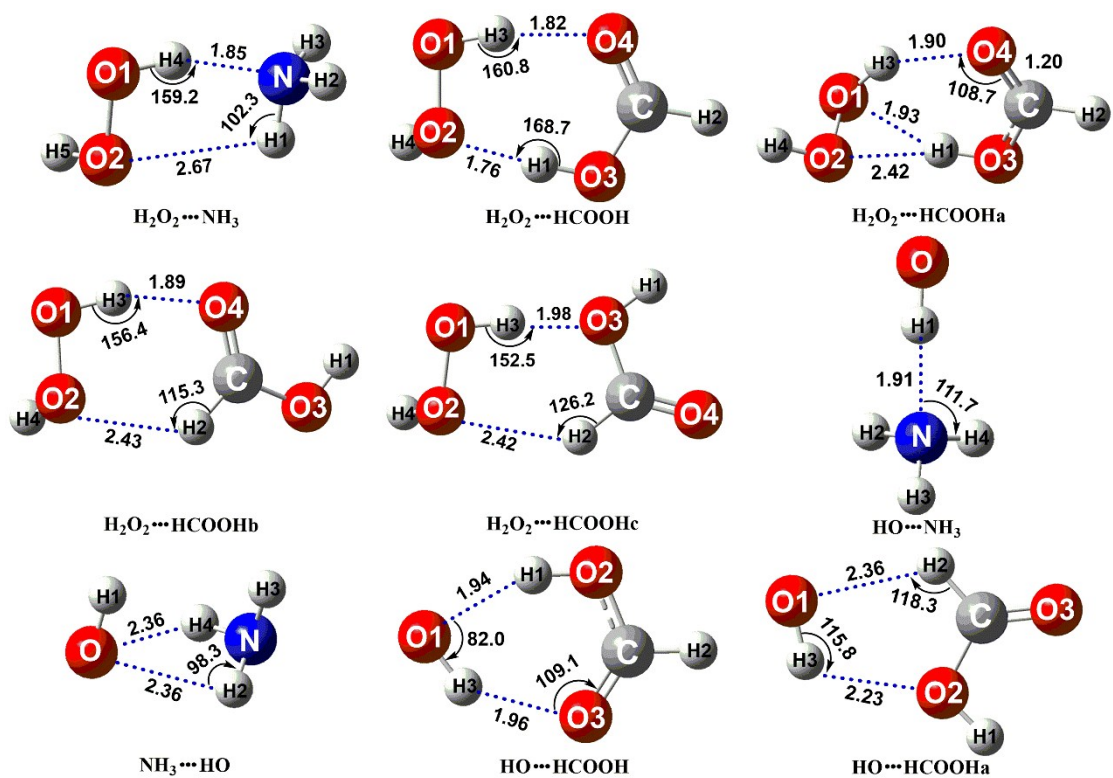

**Fig. S3** Optimized geometries of all complexes for the  $\text{H}_2\text{O}_2 + \text{HO} \rightarrow \text{HO}_2 + \text{H}_2\text{O}$  reaction with acidic ( $\text{HCOOH}$ ) and basic ( $\text{NH}_3$ ) catalysts at the M06-2X/aug-cc-pVTZ level

**Table S2** Relative energies ( $\Delta E$ ), ( $\Delta E + ZPE$ ), enthalpies ( $\Delta H$ ) and free energies ( $\Delta G$ ) for the possible stable complexes between  $H_2O_2$  (or HO) and the catalyst  $X$  ( $X = NH_3$  and HCOOH) at the CCSD(T)-F12a/cc-pVDZ-F12//M06-2X/aug-cc-pVTZ level

| <i>Species</i>          | $\Delta E(298\text{ K})$<br>(kcal·mol <sup>-1</sup> ) | $\Delta H(298\text{ K})$<br>(kcal·mol <sup>-1</sup> ) | $\Delta G(298\text{ K})$<br>(kcal·mol <sup>-1</sup> ) | $\Delta(E + ZPE)$<br>(298 K)<br>(kcal·mol <sup>-1</sup> ) |
|-------------------------|-------------------------------------------------------|-------------------------------------------------------|-------------------------------------------------------|-----------------------------------------------------------|
| $H_2O_2 + NH_3$         | 0.0                                                   | 0.0                                                   | 0.0                                                   | 0.0                                                       |
| $H_2O_2 \cdots NH_3$    | -8.6                                                  | -6.9                                                  | 0.8                                                   | -6.6                                                      |
| $HO + NH_3$             | 0.0                                                   | 0.0                                                   | 0.0                                                   | 0.0                                                       |
| $HO \cdots NH_3$        | -7.8                                                  | -6.3                                                  | 1.1                                                   | -5.5                                                      |
| $NH_3 \cdots HO$        | -1.6                                                  | -0.4                                                  | 6.2                                                   | 0.0                                                       |
| $H_2O_2 + HCOOH$        | 0.0                                                   | 0.0                                                   | 0.0                                                   | 0.0                                                       |
| $H_2O_2 \cdots HCOOH$   | -12.1                                                 | -10.5                                                 | -0.5                                                  | -10.1                                                     |
| $H_2O_2 \cdots HCOOH_a$ | -9.6                                                  | -8.0                                                  | 1.5                                                   | -7.8                                                      |
| $H_2O_2 \cdots HCOOH_b$ | -7.2                                                  | -5.6                                                  | 2.9                                                   | -5.7                                                      |
| $H_2O_2 \cdots HCOOH_c$ | -4.8                                                  | -3.3                                                  | 4.7                                                   | -3.5                                                      |
| $HO + HCOOH$            | 0.0                                                   | 0.0                                                   | 0.0                                                   | 0.0                                                       |
| $HO \cdots HCOOH$       | -5.5                                                  | -4.1                                                  | 4.4                                                   | -4.9                                                      |
| $HO \cdots HCOOH_a$     | -3.2                                                  | -2.1                                                  | 4.6                                                   | -2.0                                                      |

**Table S3** Equilibrium constants ( $\text{cm}^3 \cdot \text{molecule}^{-1}$ ) for the formation of two-body complexes between  $\text{H}_2\text{O}_2$  (or HO) and the catalyst  $X$  ( $X = \text{NH}_3$  and  $\text{HCOOH}$ ) within the temperature range of 213-320 K

| $T/\text{K}$ | $K_{\text{eq}}(\text{H}_2\text{O}_2 \cdots \text{H}_2\text{O})$ | $K_{\text{eq}}(\text{H}_2\text{O}_2 \cdots \text{NH}_3)$    | $K_{\text{eq}}(\text{HO} \cdots \text{NH}_3)$                                    | $K_{\text{eq}}(\text{NH}_3 \cdots \text{HO})$                                                | $K_{\text{eq}}(\text{H}_2\text{O}_2 \cdots \text{HCOOH})$       |
|--------------|-----------------------------------------------------------------|-------------------------------------------------------------|----------------------------------------------------------------------------------|----------------------------------------------------------------------------------------------|-----------------------------------------------------------------|
| 213          | $5.05 \times 10^{-23}$                                          | $2.01 \times 10^{-20}$                                      | $6.20 \times 10^{-21}$                                                           | $1.22 \times 10^{-25}$                                                                       | $2.13 \times 10^{-18}$                                          |
| 230          | $3.20 \times 10^{-23}$                                          | $8.90 \times 10^{-21}$                                      | $3.36 \times 10^{-21}$                                                           | $1.60 \times 10^{-25}$                                                                       | $5.05 \times 10^{-19}$                                          |
| 259          | $1.71 \times 10^{-23}$                                          | $2.88 \times 10^{-21}$                                      | $1.43 \times 10^{-21}$                                                           | $2.37 \times 10^{-25}$                                                                       | $6.80 \times 10^{-20}$                                          |
| 280          | $1.20 \times 10^{-23}$                                          | $1.49 \times 10^{-21}$                                      | $8.65 \times 10^{-22}$                                                           | $3.04 \times 10^{-25}$                                                                       | $2.10 \times 10^{-20}$                                          |
| 290          | $1.03 \times 10^{-23}$                                          | $1.13 \times 10^{-21}$                                      | $7.00 \times 10^{-22}$                                                           | $3.39 \times 10^{-25}$                                                                       | $1.28 \times 10^{-20}$                                          |
| 298          | $9.20 \times 10^{-24}$                                          | $9.20 \times 10^{-22}$                                      | $5.95 \times 10^{-22}$                                                           | $3.69 \times 10^{-25}$                                                                       | $8.75 \times 10^{-21}$                                          |
| Con.         | $7.05 \times 10^3$ (100% RH)                                    | 65.50 (2900 ppbv)<br>0.23 (10 ppbv)                         | 0.42 (2900 ppbv)<br>$1.49 \times 10^{-3}$ (10 ppbv)<br>$(1.35 \times 10^{-3})^a$ | $2.62 \times 10^{-4}$ (2900 ppbv)<br>$9.2 \times 10^{-7}$ (10 ppbv)                          | 2.10 (High)<br>0.17 (Average)                                   |
| 300          | $8.95 \times 10^{-24}$                                          | $8.75 \times 10^{-22}$                                      | $5.75 \times 10^{-22}$                                                           | $3.76 \times 10^{-25}$                                                                       | $8.00 \times 10^{-21}$                                          |
| 310          | $7.85 \times 10^{-24}$                                          | $6.90 \times 10^{-22}$                                      | $4.79 \times 10^{-22}$                                                           | $4.15 \times 10^{-25}$                                                                       | $5.20 \times 10^{-21}$                                          |
| 320          | $7.00 \times 10^{-24}$                                          | $5.55 \times 10^{-22}$                                      | $4.04 \times 10^{-22}$                                                           | $4.57 \times 10^{-25}$                                                                       | $3.49 \times 10^{-21}$                                          |
| $T/\text{K}$ | $K_{\text{eq}}(\text{H}_2\text{O}_2 \cdots \text{HCOOH}_a)$     | $K_{\text{eq}}(\text{H}_2\text{O}_2 \cdots \text{HCOOH}_b)$ | $K_{\text{eq}}(\text{H}_2\text{O}_2 \cdots \text{HCOOH}_c)$                      | $K_{\text{eq}}(\text{HO} \cdots \text{HCOOH})$                                               | $K_{\text{eq}}(\text{HO} \cdots \text{HCOOH}_a)$                |
| 213          | $2.11 \times 10^{-20}$                                          | $7.10 \times 10^{-22}$                                      | $1.59 \times 10^{-23}$                                                           | $5.05 \times 10^{-23}$                                                                       | $1.72 \times 10^{-23}$                                          |
| 230          | $7.50 \times 10^{-21}$                                          | $3.67 \times 10^{-22}$                                      | $1.14 \times 10^{-23}$                                                           | $3.80 \times 10^{-23}$                                                                       | $1.55 \times 10^{-23}$                                          |
| 259          | $1.80 \times 10^{-21}$                                          | $1.49 \times 10^{-22}$                                      | $7.35 \times 10^{-24}$                                                           | $2.57 \times 10^{-23}$                                                                       | $1.36 \times 10^{-23}$                                          |
| 280          | $7.80 \times 10^{-22}$                                          | $8.80 \times 10^{-23}$                                      | $5.80 \times 10^{-24}$                                                           | $2.05 \times 10^{-23}$                                                                       | $1.28 \times 10^{-23}$                                          |
| 290          | $5.50 \times 10^{-22}$                                          | $7.05 \times 10^{-23}$                                      | $5.25 \times 10^{-24}$                                                           | $1.86 \times 10^{-23}$                                                                       | $1.25 \times 10^{-23}$                                          |
| 298          | $4.22 \times 10^{-22}$                                          | $6.00 \times 10^{-23}$                                      | $4.88 \times 10^{-24}$                                                           | $1.74 \times 10^{-23}$                                                                       | $1.23 \times 10^{-23}$                                          |
| Con.         | 0.10 (High)<br>$8.00 \times 10^{-3}$ (Average)                  | 0.01 (High)<br>$1.14 \times 10^{-3}$ (Average)              | $1.17 \times 10^{-3}$ (High)<br>$9.25 \times 10^{-5}$ (Average)                  | $4.17 \times 10^{-5}$ (High)<br>$3.30 \times 10^{-6}$ (Average)<br>$(4.90 \times 10^{-5})^a$ | $2.95 \times 10^{-5}$ (High)<br>$2.34 \times 10^{-6}$ (Average) |
| 300          | $3.96 \times 10^{-22}$                                          | $5.80 \times 10^{-23}$                                      | $4.80 \times 10^{-24}$                                                           | $1.71 \times 10^{-23}$                                                                       | $1.23 \times 10^{-23}$                                          |
| 310          | $2.93 \times 10^{-22}$                                          | $4.81 \times 10^{-23}$                                      | $4.43 \times 10^{-24}$                                                           | $1.58 \times 10^{-23}$                                                                       | $1.21 \times 10^{-23}$                                          |
| 320          | $2.21 \times 10^{-22}$                                          | $4.05 \times 10^{-23}$                                      | $4.13 \times 10^{-24}$                                                           | $1.47 \times 10^{-23}$                                                                       | $1.20 \times 10^{-23}$                                          |

<sup>a</sup> The Value was from Ref (S. Mallick, S. Sarkar, P. Kumar and B. Bandyopadhyay, *J. Phys. Chem. A*, 2018, **122**, 350-363.)

**Table S4** Equilibrium constants ( $\text{cm}^3 \cdot \text{molecule}^{-1}$ ) for three-body complexes constituted by  $\text{H}_2\text{O}_2$ , HO and catalyst  $X$  ( $X = \text{NH}_3$  and  $\text{HCOOH}$ ) within the temperature range of 213-320 K

| $T/\text{K}$ | $K_{\text{eq}}(\text{R1})$      | $K_{\text{eq}}(\text{R\_WM})$  | $K_{\text{eq}}(\text{R\_AM1})$  | $K_{\text{eq}}(\text{R\_AM2a})$ | $K_{\text{eq}}(\text{R\_AM2b})$ | $K_{\text{eq}}(\text{R\_AM3a})$ |
|--------------|---------------------------------|--------------------------------|---------------------------------|---------------------------------|---------------------------------|---------------------------------|
| 213          | $1.46 \times 10^{-11}$          | $2.47 \times 10^{-24}$         | $2.20 \times 10^{-17}$          | $8.20 \times 10^{-28}$          | $1.60 \times 10^{-21}$          | $1.05 \times 10^{-23}$          |
| 230          | $1.44 \times 10^{-12}$          | $1.77 \times 10^{-24}$         | $5.80 \times 10^{-18}$          | $1.06 \times 10^{-27}$          | $7.20 \times 10^{-22}$          | $7.95 \times 10^{-24}$          |
| 259          | $5.55 \times 10^{-14}$          | $1.09 \times 10^{-24}$         | $9.05 \times 10^{-19}$          | $1.50 \times 10^{-27}$          | $2.40 \times 10^{-22}$          | $5.40 \times 10^{-24}$          |
| 280          | $8.05 \times 10^{-15}$          | $8.10 \times 10^{-25}$         | $3.01 \times 10^{-19}$          | $1.84 \times 10^{-27}$          | $1.26 \times 10^{-22}$          | $4.33 \times 10^{-24}$          |
| 290          | $3.54 \times 10^{-15}$          | $7.15 \times 10^{-25}$         | $1.89 \times 10^{-19}$          | $2.00 \times 10^{-27}$          | $9.65 \times 10^{-23}$          | $3.94 \times 10^{-24}$          |
| 298          | $1.91 \times 10^{-15}$          | $6.50 \times 10^{-25}$         | $1.33 \times 10^{-19}$          | $2.13 \times 10^{-27}$          | $7.90 \times 10^{-23}$          | $3.68 \times 10^{-24}$          |
| 300          | $1.65 \times 10^{-15}$          | $6.35 \times 10^{-25}$         | $1.22 \times 10^{-19}$          | $2.16 \times 10^{-27}$          | $7.50 \times 10^{-23}$          | $3.62 \times 10^{-24}$          |
| 310          | $8.05 \times 10^{-16}$          | $5.70 \times 10^{-25}$         | $8.15 \times 10^{-20}$          | $2.32 \times 10^{-27}$          | $5.95 \times 10^{-23}$          | $3.34 \times 10^{-24}$          |
| 320          | $4.11 \times 10^{-16}$          | $5.10 \times 10^{-25}$         | $5.60 \times 10^{-20}$          | $2.48 \times 10^{-27}$          | $4.81 \times 10^{-23}$          | $3.10 \times 10^{-24}$          |
| $T/\text{K}$ | $K_{\text{eq}}(\text{R\_AM3b})$ | $K_{\text{eq}}(\text{R\_FA1})$ | $K_{\text{eq}}(\text{R\_FA2a})$ | $K_{\text{eq}}(\text{R\_FA2b})$ | $K_{\text{eq}}(\text{R\_FA3a})$ | $K_{\text{eq}}(\text{R\_FA3b})$ |
| 213          | $3.33 \times 10^{-15}$          | $2.49 \times 10^{-21}$         | $1.28 \times 10^{-21}$          | $4.40 \times 10^{-15}$          | $3.57 \times 10^{-23}$          | $1.55 \times 10^{-14}$          |
| 230          | $4.73 \times 10^{-16}$          | $4.50 \times 10^{-20}$         | $7.80 \times 10^{-22}$          | $6.40 \times 10^{-16}$          | $2.96 \times 10^{-23}$          | $2.14 \times 10^{-15}$          |
| 259          | $3.09 \times 10^{-17}$          | $1.09 \times 10^{-20}$         | $3.93 \times 10^{-22}$          | $4.42 \times 10^{-17}$          | $2.34 \times 10^{-23}$          | $1.36 \times 10^{-16}$          |
| 280          | $6.15 \times 10^{-18}$          | $4.70 \times 10^{-21}$         | $2.64 \times 10^{-22}$          | $9.10 \times 10^{-18}$          | $2.06 \times 10^{-23}$          | $2.67 \times 10^{-17}$          |
| 290          | $3.10 \times 10^{-18}$          | $3.30 \times 10^{-21}$         | $2.24 \times 10^{-22}$          | $4.68 \times 10^{-18}$          | $1.96 \times 10^{-23}$          | $1.35 \times 10^{-17}$          |
| 298          | $1.86 \times 10^{-18}$          | $2.53 \times 10^{-21}$         | $1.98 \times 10^{-22}$          | $2.84 \times 10^{-18}$          | $1.89 \times 10^{-23}$          | $8.05 \times 10^{-18}$          |
| 300          | $1.64 \times 10^{-18}$          | $2.38 \times 10^{-21}$         | $1.92 \times 10^{-22}$          | $2.52 \times 10^{-18}$          | $1.87 \times 10^{-23}$          | $7.10 \times 10^{-18}$          |
| 310          | $9.05 \times 10^{-19}$          | $1.75 \times 10^{-21}$         | $1.67 \times 10^{-22}$          | $1.41 \times 10^{-18}$          | $1.80 \times 10^{-23}$          | $3.92 \times 10^{-18}$          |
| 320          | $5.20 \times 10^{-19}$          | $1.32 \times 10^{-21}$         | $1.47 \times 10^{-22}$          | $8.20 \times 10^{-19}$          | $1.74 \times 10^{-23}$          | $2.25 \times 10^{-18}$          |



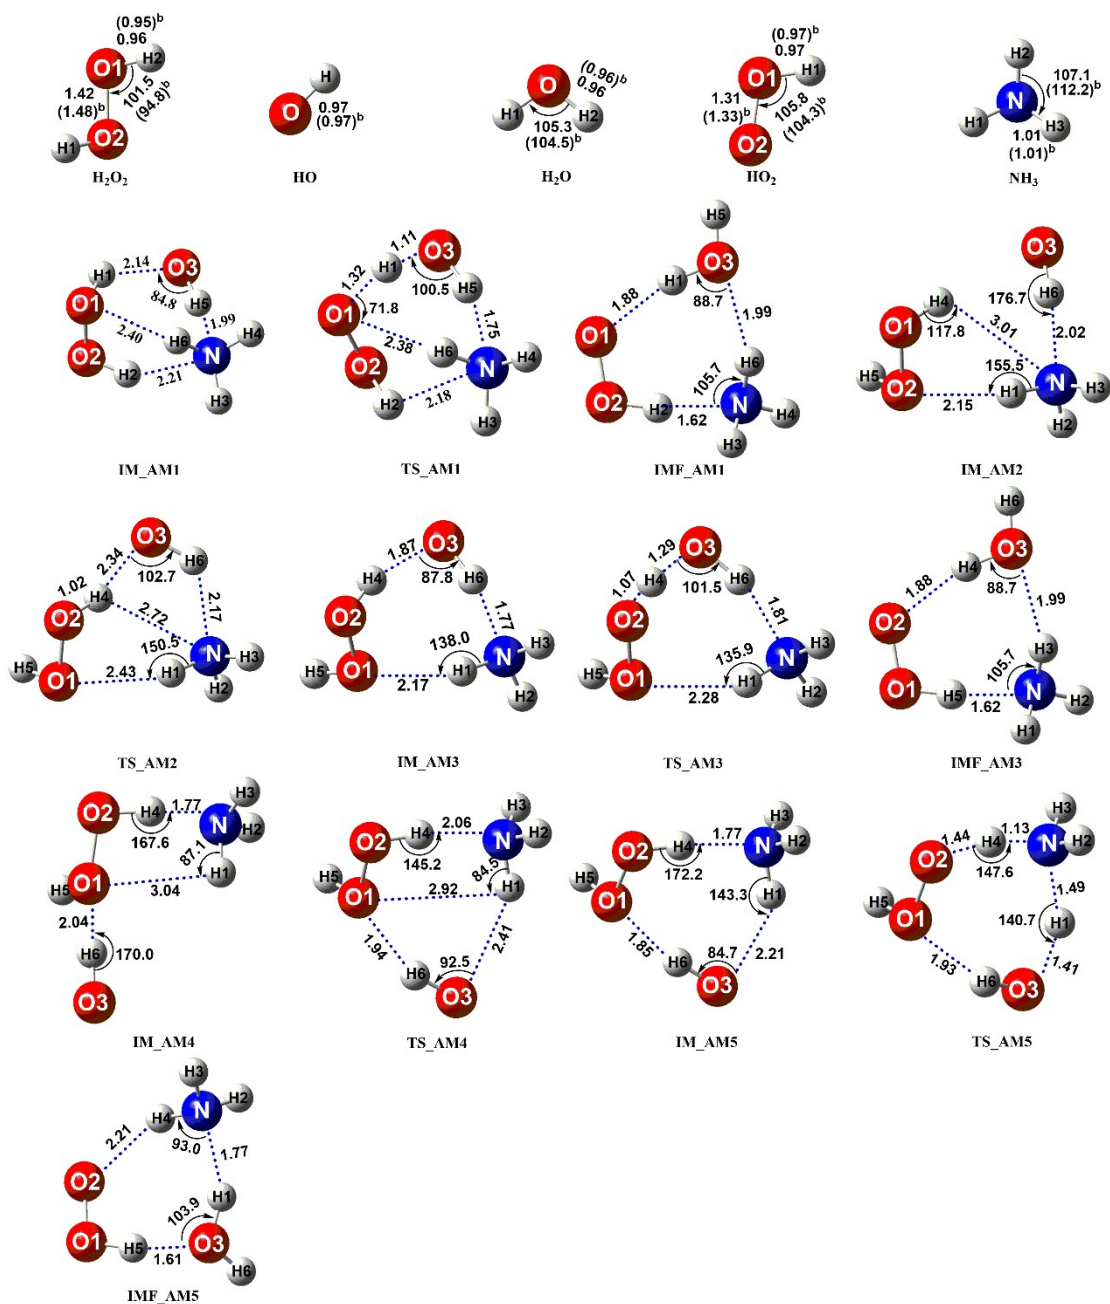

**Fig. S4** Optimized geometries for NH<sub>3</sub> catalyzed H<sub>2</sub>O<sub>2</sub> + HO → HO<sub>2</sub> + H<sub>2</sub>O reaction at the M06-2X/aug-cc-pVTZ level

<sup>b</sup> Value was from the NIST chemistry Webbook (<http://webbook.nist.gov/chemistry>.)

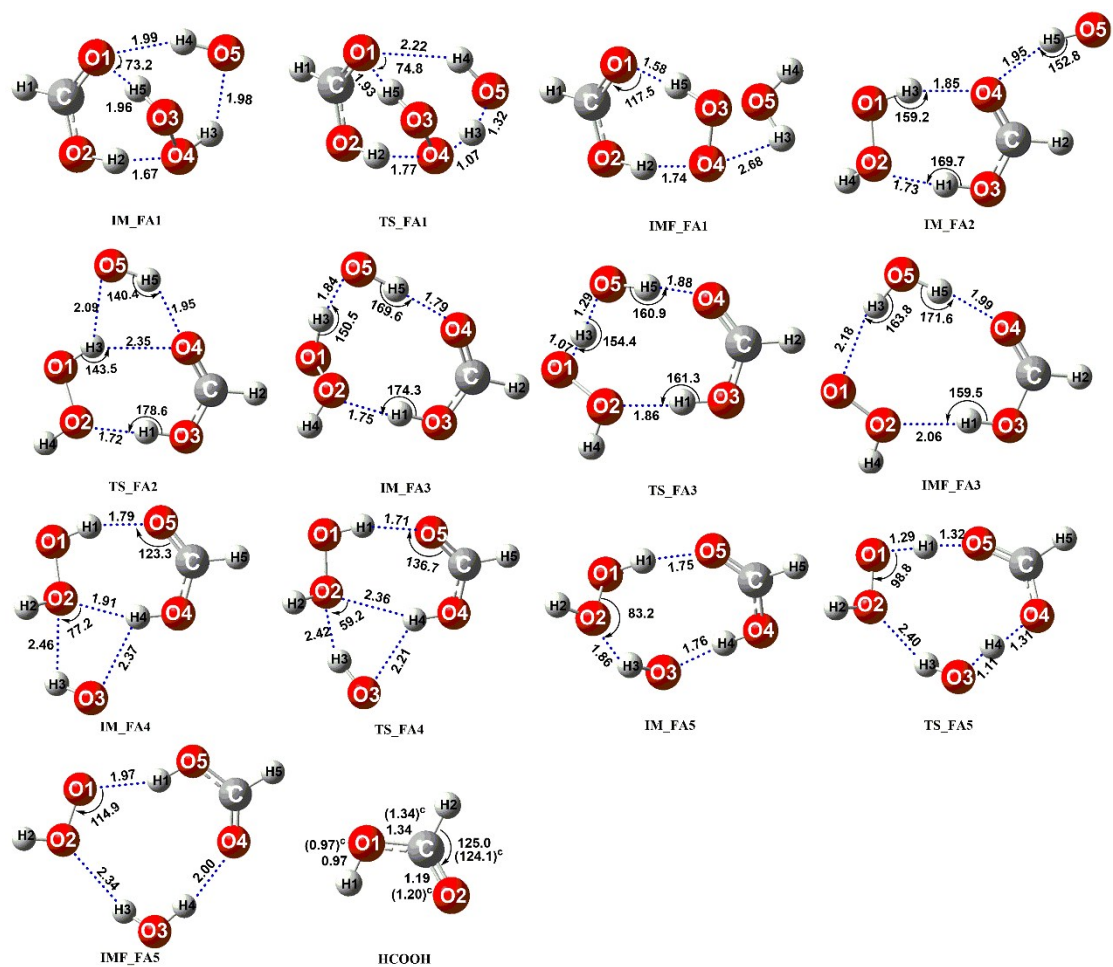

**Fig. S5** Optimized geometries for HCOOH catalyzed  $\text{H}_2\text{O}_2 + \text{HO} \rightarrow \text{HO}_2 + \text{H}_2\text{O}$  reaction at the M06-2X/aug-cc-pVTZ level

<sup>c</sup> Value was from the NIST chemistry Webbook (<http://webbook.nist.gov/chemistry>.)

**Table S5** Relative energies ( $\Delta E$ ), ( $\Delta E + ZPE$ ), enthalpies ( $\Delta H$ ), and free energies for the reactants, intermediate, and transition states involved in the  $\text{H}_2\text{O}_2 + \text{HO} \rightarrow \text{HO}_2 + \text{H}_2\text{O}$  reaction with catalyst  $X$  ( $X = \text{NH}_3$  and  $\text{HCOOH}$ ) at the CCSD(T)-F12a/cc-pVDZ-F12//M06-2X/ aug-cc-pVTZ level

| <i>Species</i>                                               | $\Delta E(298)$<br>(kcal·mol <sup>-1</sup> ) | $\Delta H(298)$<br>(kcal·mol <sup>-1</sup> ) | $\Delta G(298)$<br>(kcal·mol <sup>-1</sup> ) | $\Delta(E + ZPE)(298)$<br>(kcal·mol <sup>-1</sup> ) |
|--------------------------------------------------------------|----------------------------------------------|----------------------------------------------|----------------------------------------------|-----------------------------------------------------|
| $\text{H}_2\text{O}_2 + \text{HO}$                           | 0.0                                          | 0.0                                          | 0.0                                          | 0.0                                                 |
| IM1                                                          | -13.7                                        | -12.5                                        | -5.1                                         | -11.8                                               |
| TS1                                                          | 2.6                                          | 0.9                                          | 9.0                                          | 2.3                                                 |
| IMF1                                                         | -35.4                                        | -33.5                                        | -28.2                                        | -33.4                                               |
| $\text{H}_2\text{O} + \text{HO}_2$                           | -32.0                                        | -31.7                                        | -32.9                                        | -31.7                                               |
| $\text{H}_2\text{O}_2 + \text{H}_2\text{O} + \text{HO}$      | 0.0                                          | 0.0                                          | 0.0                                          | 0.0                                                 |
| $\text{H}_2\text{O}_2 \cdots \text{H}_2\text{O} + \text{HO}$ | -7.1                                         | -5.3                                         | 3.1                                          | -4.7                                                |
| IM_WM                                                        | -12.5                                        | -9.5                                         | 7.0                                          | -8.5                                                |
| TS_WM                                                        | -6.4                                         | -6.3                                         | 12.0                                         | -4.5                                                |
| IMF_WM                                                       | -52.7                                        | -48.9                                        | -31.0                                        | -47.4                                               |
| $2\text{H}_2\text{O} + \text{HO}_2$                          | -32.0                                        | -31.7                                        | -32.9                                        | -31.7                                               |
| $\text{H}_2\text{O}_2 + \text{NH}_3 + \text{HO}$             | 0.0                                          | 0.0                                          | 0.0                                          | 0.0                                                 |
| $\text{H}_2\text{O}_2 \cdots \text{NH}_3 + \text{HO}$        | -8.6                                         | -6.9                                         | 0.8                                          | -6.6                                                |
| IM_AM1                                                       | -20.1                                        | -17.1                                        | -1.0                                         | -16.1                                               |
| TS_AM1                                                       | -8.7                                         | -8.3                                         | 8.6                                          | -6.9                                                |
| IMF_AM1                                                      | -53.8                                        | -50.2                                        | -33.2                                        | -49.1                                               |
| $\text{H}_2\text{O} + \text{HO}_2 + \text{NH}_3$             | -32.0                                        | -31.7                                        | -32.9                                        | -31.7                                               |
| $\text{H}_2\text{O}_2 + \text{NH}_3 + \text{HO}$             | 0.0                                          | 0.0                                          | 0.0                                          | 0.0                                                 |
| $\text{H}_2\text{O}_2 \cdots \text{NH}_3 + \text{HO}$        | -8.6                                         | -6.9                                         | 0.8                                          | -6.6                                                |
| $\text{HO} \cdots \text{NH}_3 + \text{H}_2\text{O}_2$        | -7.8                                         | -6.3                                         | 1.1                                          | -5.5                                                |
| IM_AM2                                                       | -10.5                                        | -8.3                                         | 9.7                                          | -6.5                                                |
| TS_AM2                                                       | -7.2                                         | -5.5                                         | 12.0                                         | -3.9                                                |
| IM_AM3                                                       | -16.4                                        | -12.9                                        | 4.2                                          | -11.8                                               |
| TS_AM3                                                       | -8.2                                         | -9.0                                         | 8.6                                          | -7.4                                                |
| IMF_AM3                                                      | -53.8                                        | -50.2                                        | -33.1                                        | -49.1                                               |
| $\text{H}_2\text{O} + \text{HO}_2 + \text{NH}_3$             | -32.0                                        | -31.7                                        | -32.9                                        | -31.7                                               |
| $\text{H}_2\text{O}_2 + \text{NH}_3 + \text{HO}$             | 0.0                                          | 0.0                                          | 0.0                                          | 0.0                                                 |
| $\text{H}_2\text{O}_2 \cdots \text{NH}_3 + \text{HO}$        | -8.6                                         | -6.9                                         | 0.8                                          | -6.6                                                |
| $\text{NH}_3 \cdots \text{HO} + \text{H}_2\text{O}_2$        | -1.6                                         | -0.4                                         | 6.2                                          | 0.0                                                 |
| IM_AM4                                                       | -13.5                                        | -10.9                                        | 5.5                                          | -9.8                                                |
| TS_AM4                                                       | -8.0                                         | -6.2                                         | 11.4                                         | -4.6                                                |
| IM_AM5                                                       | -17.4                                        | -14.4                                        | 2.5                                          | -13.3                                               |
| TS_AM5                                                       | 21.1                                         | 19.6                                         | 39.8                                         | 22.1                                                |
| IMF_AM5                                                      | -53.0                                        | -49.4                                        | -31.9                                        | -48.2                                               |
| $\text{H}_2\text{O} + \text{HO}_2 + \text{NH}_3$             | -32.0                                        | -31.7                                        | -32.9                                        | -31.7                                               |
| $\text{H}_2\text{O}_2 + \text{HCOOH} + \text{HO}$            | 0.0                                          | 0.0                                          | 0.0                                          | 0.0                                                 |
| $\text{H}_2\text{O}_2 \cdots \text{HCOOH} + \text{HO}$       | -12.1                                        | -10.5                                        | -0.5                                         | -10.1                                               |
| IM_FA1                                                       | -19.5                                        | -16.8                                        | 1.6                                          | -16.0                                               |
| TS_FA1                                                       | -10.7                                        | -11.0                                        | 8.8                                          | -9.5                                                |
| IMF_FA1                                                      | -50.8                                        | -47.7                                        | -29.8                                        | -47.3                                               |
| $\text{H}_2\text{O} + \text{HO}_2 + \text{HCOOH}$            | -32.0                                        | -31.7                                        | -32.9                                        | -31.7                                               |
| $\text{H}_2\text{O}_2 + \text{HCOOH} + \text{HO}$            | 0.0                                          | 0.0                                          | 0.0                                          | 0.0                                                 |
| $\text{H}_2\text{O}_2 \cdots \text{HCOOH} + \text{HO}$       | -12.1                                        | -10.5                                        | -0.5                                         | -10.1                                               |
| $\text{HO} \cdots \text{HCOOH} + \text{H}_2\text{O}_2$       | -5.5                                         | -4.1                                         | 4.4                                          | -4.9                                                |
| IM_FA2                                                       | -18.3                                        | -15.3                                        | 2.0                                          | -14.7                                               |
| TS_FA2                                                       | -14.2                                        | -12.3                                        | 6.2                                          | -11.3                                               |
| IM_FA3                                                       | -19.8                                        | -16.9                                        | 1.3                                          | -16.2                                               |
| TS_FA3                                                       | -7.9                                         | -8.6                                         | 10.2                                         | -7.3                                                |

|                                             |       |       |       |       |
|---------------------------------------------|-------|-------|-------|-------|
| IMF_FA3                                     | -40.9 | -37.7 | -22.8 | -37.5 |
| H <sub>2</sub> O + HO <sub>2</sub> + HCOOH  | -32.0 | -31.7 | -32.9 | -31.7 |
| H <sub>2</sub> O <sub>2</sub> + HCOOH + HO  | 0.0   | 0.0   | 0.0   | 0.0   |
| H <sub>2</sub> O <sub>2</sub> ···HCOOH + HO | -12.1 | -10.5 | -0.5  | -10.1 |
| HO···HCOOH + H <sub>2</sub> O <sub>2</sub>  | -5.5  | -4.1  | 4.4   | -4.9  |
| IM_FA4                                      | -15.7 | -13.0 | 4.2   | -12.6 |
| TS_FA4                                      | -12.6 | -10.4 | 8.5   | -9.2  |
| IM_FA5                                      | -19.9 | -17.1 | 0.8   | -16.4 |
| TS_FA5                                      | 19.6  | 16.1  | 37.2  | 18.4  |
| IMF_FA5                                     | -42.6 | -39.6 | -23.1 | -39.4 |
| H <sub>2</sub> O + HO <sub>2</sub> + HCOOH  | -32.0 | -31.7 | -32.9 | -31.7 |

**Table S6** Calculated rate coefficients ( $\text{cm}^3 \cdot \text{molecules}^{-1} \cdot \text{s}^{-1}$ ) for the  $\text{H}_2\text{O}_2 + \text{HO} \rightarrow \text{HO}_2 + \text{H}_2\text{O}$  reaction in the presence of catalyst  $X$  ( $X = \text{NH}_3$  and  $\text{HCOOH}$ ) within the temperature range of 213-320 K

| $T/\text{K}$ | $k_{\text{R\_WM}}$     | $k_{\text{R\_AM1}}$    | $k_{\text{R\_AM2a}}$   | $k_{\text{R\_AM2b}}$   | $k_{\text{R\_AM3a}}$   | $k_{\text{R\_AM3b}}$   |
|--------------|------------------------|------------------------|------------------------|------------------------|------------------------|------------------------|
| 213          | $9.46 \times 10^{-12}$ | $1.11 \times 10^{-9}$  | $2.71 \times 10^{-17}$ | $5.72 \times 10^{-10}$ | $5.13 \times 10^{-36}$ | $1.63 \times 10^{-27}$ |
| 230          | $8.48 \times 10^{-12}$ | $5.31 \times 10^{-10}$ | $5.13 \times 10^{-17}$ | $2.78 \times 10^{-10}$ | $1.20 \times 10^{-35}$ | $7.13 \times 10^{-28}$ |
| 259          | $7.34 \times 10^{-12}$ | $2.15 \times 10^{-10}$ | $1.23 \times 10^{-16}$ | $1.04 \times 10^{-10}$ | $6.34 \times 10^{-35}$ | $3.63 \times 10^{-28}$ |
| 280          | $6.82 \times 10^{-12}$ | $1.35 \times 10^{-10}$ | $2.06 \times 10^{-16}$ | $5.91 \times 10^{-11}$ | $2.49 \times 10^{-34}$ | $3.54 \times 10^{-28}$ |
| 290          | $6.65 \times 10^{-12}$ | $1.13 \times 10^{-10}$ | $2.54 \times 10^{-16}$ | $4.68 \times 10^{-11}$ | $4.98 \times 10^{-34}$ | $3.92 \times 10^{-28}$ |
| 298          | $6.53 \times 10^{-12}$ | $9.95 \times 10^{-11}$ | $2.98 \times 10^{-16}$ | $3.93 \times 10^{-11}$ | $8.84 \times 10^{-34}$ | $4.47 \times 10^{-28}$ |
| 300          | $6.51 \times 10^{-12}$ | $9.64 \times 10^{-11}$ | $3.09 \times 10^{-16}$ | $3.75 \times 10^{-11}$ | $1.02 \times 10^{-33}$ | $4.63 \times 10^{-28}$ |
| 310          | $6.41 \times 10^{-12}$ | $8.39 \times 10^{-11}$ | $3.70 \times 10^{-16}$ | $3.06 \times 10^{-11}$ | $2.14 \times 10^{-33}$ | $5.81 \times 10^{-28}$ |
| 320          | $6.27 \times 10^{-12}$ | $7.43 \times 10^{-11}$ | $4.38 \times 10^{-16}$ | $2.55 \times 10^{-11}$ | $4.58 \times 10^{-33}$ | $7.69 \times 10^{-28}$ |
| $T/\text{K}$ | $k_{\text{R\_FA1}}$    | $k_{\text{R\_FA2a}}$   | $k_{\text{R\_FA2b}}$   | $k_{\text{R\_FA3a}}$   | $k_{\text{R\_FA3b}}$   |                        |
| 213          | $2.50 \times 10^{-11}$ | $5.90 \times 10^{-13}$ | $3.58 \times 10^{-6}$  | $6.11 \times 10^{-32}$ | $2.65 \times 10^{-23}$ |                        |
| 230          | $5.48 \times 10^{-10}$ | $5.10 \times 10^{-13}$ | $6.64 \times 10^{-7}$  | $1.14 \times 10^{-31}$ | $8.24 \times 10^{-24}$ |                        |
| 259          | $1.80 \times 10^{-10}$ | $4.27 \times 10^{-13}$ | $6.84 \times 10^{-8}$  | $3.92 \times 10^{-31}$ | $2.28 \times 10^{-24}$ |                        |
| 280          | $9.50 \times 10^{-11}$ | $3.95 \times 10^{-13}$ | $1.86 \times 10^{-8}$  | $1.07 \times 10^{-30}$ | $1.38 \times 10^{-24}$ |                        |
| 290          | $7.32 \times 10^{-11}$ | $3.87 \times 10^{-13}$ | $1.09 \times 10^{-8}$  | $1.78 \times 10^{-30}$ | $1.22 \times 10^{-24}$ |                        |
| 298          | $6.07 \times 10^{-11}$ | $3.82 \times 10^{-13}$ | $7.29 \times 10^{-9}$  | $2.70 \times 10^{-30}$ | $1.15 \times 10^{-24}$ |                        |
| 300          | $5.81 \times 10^{-11}$ | $3.81 \times 10^{-13}$ | $6.64 \times 10^{-9}$  | $3.00 \times 10^{-30}$ | $1.14 \times 10^{-24}$ |                        |
| 310          | $4.67 \times 10^{-11}$ | $3.78 \times 10^{-13}$ | $4.20 \times 10^{-9}$  | $5.17 \times 10^{-30}$ | $1.13 \times 10^{-24}$ |                        |
| 320          | $3.83 \times 10^{-11}$ | $3.79 \times 10^{-13}$ | $2.76 \times 10^{-9}$  | $9.05 \times 10^{-30}$ | $1.17 \times 10^{-24}$ |                        |

**Table S7** Effective rate coefficients ( $k_t^1$ ) ( $\text{cm}^3 \cdot \text{molecules}^{-1} \cdot \text{s}^{-1}$ ) for the  $\text{H}_2\text{O}_2 + \text{HO} \rightarrow \text{HO}_2 + \text{H}_2\text{O}$  reaction with basic ( $\text{NH}_3$ ) and acidic ( $\text{HCOOH}$ ) within the temperature range of 280-320 K

| $T/\text{K}$ | $k_t^1(\text{R\_AM1})$<br>(10 ppbv)       | $k_t^1(\text{R\_AM1})$<br>(2900 ppbv)    | $k_t^1(\text{R\_AM2a})$<br>(10 ppbv)       | $k_t^1(\text{R\_AM2a})$<br>(2900 ppbv)    | $k_t^1(\text{R\_AM2b})$<br>(10 ppbv)       | $k_t^1(\text{R\_AM2b})$<br>(2900 ppbv)    | $k_t^1(\text{R\_AM3a})$<br>(10 ppbv)       | $k_t^1(\text{R\_AM3a})$<br>(2900 ppbv)    | $k_t^1(\text{R\_AM3b})$<br>(10 ppbv)       | $k_t^1(\text{R\_AM3b})$<br>(2900 ppbv)    |
|--------------|-------------------------------------------|------------------------------------------|--------------------------------------------|-------------------------------------------|--------------------------------------------|-------------------------------------------|--------------------------------------------|-------------------------------------------|--------------------------------------------|-------------------------------------------|
| 280          | $5.25 \times 10^{-20}$                    | $1.53 \times 10^{-17}$                   | $7.97 \times 10^{-26}$                     | $2.33 \times 10^{-23}$                    | $1.33 \times 10^{-20}$                     | $3.88 \times 10^{-18}$                    | $9.65 \times 10^{-44}$                     | $2.82 \times 10^{-41}$                    | $2.80 \times 10^{-41}$                     | $8.18 \times 10^{-39}$                    |
| 290          | $3.20 \times 10^{-20}$                    | $9.35 \times 10^{-18}$                   | $7.18 \times 10^{-26}$                     | $2.10 \times 10^{-23}$                    | $8.18 \times 10^{-21}$                     | $2.39 \times 10^{-18}$                    | $1.41 \times 10^{-43}$                     | $4.11 \times 10^{-41}$                    | $3.32 \times 10^{-41}$                     | $9.70 \times 10^{-39}$                    |
| 298          | $2.29 \times 10^{-20}$                    | $6.50 \times 10^{-18}$                   | $6.85 \times 10^{-26}$                     | $1.95 \times 10^{-23}$                    | $5.84 \times 10^{-21}$                     | $1.66 \times 10^{-18}$                    | $2.03 \times 10^{-43}$                     | $5.77 \times 10^{-41}$                    | $4.12 \times 10^{-41}$                     | $1.17 \times 10^{-38}$                    |
| 300          | $2.02 \times 10^{-20}$                    | $5.99 \times 10^{-18}$                   | $6.49 \times 10^{-26}$                     | $1.92 \times 10^{-23}$                    | $5.18 \times 10^{-21}$                     | $1.53 \times 10^{-18}$                    | $2.15 \times 10^{-43}$                     | $6.35 \times 10^{-41}$                    | $4.18 \times 10^{-41}$                     | $1.24 \times 10^{-38}$                    |
| 310          | $1.39 \times 10^{-20}$                    | $3.99 \times 10^{-18}$                   | $6.13 \times 10^{-26}$                     | $1.76 \times 10^{-23}$                    | $3.52 \times 10^{-21}$                     | $1.01 \times 10^{-18}$                    | $3.55 \times 10^{-43}$                     | $1.02 \times 10^{-40}$                    | $5.78 \times 10^{-41}$                     | $1.66 \times 10^{-38}$                    |
| 320          | $9.49 \times 10^{-21}$                    | $2.76 \times 10^{-18}$                   | $5.59 \times 10^{-26}$                     | $1.63 \times 10^{-23}$                    | $2.37 \times 10^{-21}$                     | $6.90 \times 10^{-19}$                    | $5.85 \times 10^{-43}$                     | $1.70 \times 10^{-40}$                    | $8.08 \times 10^{-41}$                     | $2.35 \times 10^{-38}$                    |
| $T/\text{K}$ | $k_t^1(\text{R\_FA1})$<br>(Low,0.01 ppbv) | $k_t^1(\text{R\_FA1})$<br>(High,10 ppbv) | $k_t^1(\text{R\_FA2a})$<br>(Low,0.01 ppbv) | $k_t^1(\text{R\_FA2a})$<br>(High,10 ppbv) | $k_t^1(\text{R\_FA2b})$<br>(Low,0.01 ppbv) | $k_t^1(\text{R\_FA2b})$<br>(High,10 ppbv) | $k_t^1(\text{R\_FA3a})$<br>(Low,0.01 ppbv) | $k_t^1(\text{R\_FA3a})$<br>(High,10 ppbv) | $k_t^1(\text{R\_FA3b})$<br>(Low,0.01 ppbv) | $k_t^1(\text{R\_FA3b})$<br>(High,10 ppbv) |
| 280          | $5.19 \times 10^{-22}$                    | $5.19 \times 10^{-19}$                   | $2.16 \times 10^{-24}$                     | $2.16 \times 10^{-21}$                    | $9.90 \times 10^{-23}$                     | $9.90 \times 10^{-20}$                    | $5.83 \times 10^{-42}$                     | $5.83 \times 10^{-39}$                    | $7.38 \times 10^{-39}$                     | $7.38 \times 10^{-36}$                    |
| 290          | $2.34 \times 10^{-22}$                    | $2.34 \times 10^{-19}$                   | $1.24 \times 10^{-24}$                     | $1.24 \times 10^{-21}$                    | $5.05 \times 10^{-23}$                     | $5.05 \times 10^{-20}$                    | $5.68 \times 10^{-42}$                     | $5.68 \times 10^{-39}$                    | $5.69 \times 10^{-39}$                     | $5.69 \times 10^{-36}$                    |
| 298          | $1.27 \times 10^{-22}$                    | $1.27 \times 10^{-19}$                   | $8.03 \times 10^{-25}$                     | $8.03 \times 10^{-22}$                    | $3.05 \times 10^{-23}$                     | $3.05 \times 10^{-20}$                    | $5.67 \times 10^{-42}$                     | $5.67 \times 10^{-39}$                    | $4.80 \times 10^{-39}$                     | $4.80 \times 10^{-36}$                    |
| 300          | $1.12 \times 10^{-22}$                    | $1.12 \times 10^{-19}$                   | $7.31 \times 10^{-25}$                     | $7.31 \times 10^{-22}$                    | $2.72 \times 10^{-23}$                     | $2.72 \times 10^{-20}$                    | $5.76 \times 10^{-42}$                     | $5.76 \times 10^{-39}$                    | $4.67 \times 10^{-39}$                     | $4.67 \times 10^{-36}$                    |
| 310          | $5.82 \times 10^{-23}$                    | $5.82 \times 10^{-20}$                   | $4.72 \times 10^{-25}$                     | $4.72 \times 10^{-22}$                    | $1.59 \times 10^{-23}$                     | $1.59 \times 10^{-20}$                    | $6.45 \times 10^{-42}$                     | $6.45 \times 10^{-39}$                    | $4.27 \times 10^{-39}$                     | $4.27 \times 10^{-36}$                    |
| 320          | $3.07 \times 10^{-23}$                    | $3.07 \times 10^{-20}$                   | $3.04 \times 10^{-25}$                     | $3.04 \times 10^{-22}$                    | $9.33 \times 10^{-24}$                     | $9.33 \times 10^{-21}$                    | $7.26 \times 10^{-42}$                     | $7.26 \times 10^{-39}$                    | $3.96 \times 10^{-39}$                     | $3.96 \times 10^{-36}$                    |

**Table S8** Concentrations of  $X$  ( $X = \text{H}_2\text{O}$ ,  $\text{NH}_3$ ,  $\text{HCOOH}$  and  $\text{H}_2\text{SO}_4$ ) (in molecule·cm<sup>-3</sup>) within the temperature range of 280-320 K at 0 km altitude

| Catalyst                |           | 280 K                | 290 K                | 298 K                | 300 K                | 310 K                | 320 K                |
|-------------------------|-----------|----------------------|----------------------|----------------------|----------------------|----------------------|----------------------|
| $\text{H}_2\text{O}$    | 20% RH    | $5.2 \times 10^{16}$ | $9.6 \times 10^{16}$ | $1.5 \times 10^{17}$ | $1.7 \times 10^{17}$ | $2.9 \times 10^{17}$ | $4.1 \times 10^{17}$ |
|                         | 40% RH    | $1.0 \times 10^{17}$ | $1.9 \times 10^{17}$ | $3.1 \times 10^{17}$ | $3.4 \times 10^{17}$ | $5.8 \times 10^{17}$ | $9.4 \times 10^{17}$ |
|                         | 60% RH    | $1.5 \times 10^{17}$ | $2.9 \times 10^{17}$ | $4.5 \times 10^{17}$ | $5.1 \times 10^{17}$ | $8.8 \times 10^{17}$ | $1.4 \times 10^{18}$ |
|                         | 80% RH    | $2.1 \times 10^{17}$ | $3.8 \times 10^{17}$ | $6.2 \times 10^{17}$ | $6.9 \times 10^{17}$ | $1.2 \times 10^{18}$ | $1.9 \times 10^{18}$ |
|                         | 100% RH   | $2.6 \times 10^{17}$ | $4.8 \times 10^{17}$ | $7.7 \times 10^{17}$ | $8.6 \times 10^{17}$ | $1.5 \times 10^{18}$ | $2.3 \times 10^{18}$ |
| $\text{NH}_3$           | 0.1 ppbv  | $2.6 \times 10^9$    | $2.5 \times 10^9$    | $2.5 \times 10^9$    | $2.4 \times 10^9$    | $2.4 \times 10^9$    | $2.3 \times 10^9$    |
|                         | 10 ppbv   | $2.6 \times 10^{11}$ | $2.5 \times 10^{11}$ | $2.5 \times 10^{11}$ | $2.4 \times 10^{11}$ | $2.4 \times 10^{11}$ | $2.3 \times 10^{11}$ |
|                         | 2900 ppbv | $7.6 \times 10^{13}$ | $7.3 \times 10^{13}$ | $7.1 \times 10^{13}$ | $7.1 \times 10^{13}$ | $6.9 \times 10^{13}$ | $6.7 \times 10^{13}$ |
| $\text{HCOOH}$          | High      | $2.6 \times 10^{11}$ | $2.5 \times 10^{11}$ | $2.4 \times 10^{11}$ | $2.4 \times 10^{11}$ | $2.4 \times 10^{11}$ | $2.3 \times 10^{11}$ |
|                         | Average   | $2.0 \times 10^{10}$ | $1.9 \times 10^{10}$ | $1.9 \times 10^{10}$ | $1.9 \times 10^{10}$ | $1.8 \times 10^{10}$ | $1.8 \times 10^{10}$ |
|                         | Low       | $2.6 \times 10^8$    | $2.5 \times 10^8$    | $2.4 \times 10^8$    | $2.4 \times 10^8$    | $2.4 \times 10^8$    | $2.3 \times 10^8$    |
| $\text{H}_2\text{SO}_4$ |           | $3.9 \times 10^8$    | $3.8 \times 10^8$    | $3.7 \times 10^8$    | $3.7 \times 10^8$    | $3.6 \times 10^8$    | $3.4 \times 10^8$    |

The Value was from Ref (S. Sarkar, S. Mallick, Deepak, P. Kumar and B. Bandyopadhyay, *Phys. Chem. Chem. Phys.*, 2017, **19**, 27848-27858.)

**Table S9** Coordinates and geometrical structures for the reactants, pre-reactive complexes, transition states, post-reactive complexes and products involved in catalyst  $X$  ( $X = \text{NH}_3$  and  $\text{HCOOH}$ ) assisted  $\text{H}_2\text{O}_2 + \text{HO} \rightarrow \text{HO}_2 + \text{H}_2\text{O}$  reaction at the M06-2X/aug-cc-pVTZ level

| Coordinate                                         |             |             |             | Frequency |                                                                                     |         | Structure                                                                             |
|----------------------------------------------------|-------------|-------------|-------------|-----------|-------------------------------------------------------------------------------------|---------|---------------------------------------------------------------------------------------|
| <b>H<sub>2</sub>O<sub>2</sub></b>                  |             |             |             |           |                                                                                     |         |                                                                                       |
| O                                                  | 0.00000000  | 0.71154400  | -0.05812700 | 373.20    | 1044.11                                                                             | 1355.52 | 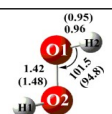   |
| H                                                  | 0.78644300  | 0.90348800  | 0.46501400  |           |                                                                                     |         |                                                                                       |
| O                                                  | 0.00000000  | -0.71154400 | -0.05812700 |           |                                                                                     |         |                                                                                       |
| H                                                  | -0.78644300 | -0.90348800 | 0.46501400  |           |                                                                                     |         |                                                                                       |
| <b>HO</b>                                          |             |             |             |           |                                                                                     |         |                                                                                       |
| O                                                  | 0.00000000  | 0.00000000  | 0.10799800  | 3744.37   |  |         |                                                                                       |
| H                                                  | 0.00000000  | 0.76273400  | -0.86398300 |           |                                                                                     |         |                                                                                       |
| <b>HO<sub>2</sub></b>                              |             |             |             |           |                                                                                     |         |                                                                                       |
| O                                                  | 0.05507400  | -0.60010800 | 0.00000000  | 1225.01   | 1462.80                                                                             | 3690.48 |    |
| H                                                  | -0.88118600 | -0.86505400 | 0.00000000  |           |                                                                                     |         |                                                                                       |
| O                                                  | 0.05507400  | 0.70824000  | 0.00000000  |           |                                                                                     |         |                                                                                       |
| <b>H<sub>2</sub>O</b>                              |             |             |             |           |                                                                                     |         |                                                                                       |
| O                                                  | 0.00000000  | 0.00000000  | 0.11635900  | 1616.15   | 3871.58                                                                             | 3975.57 |    |
| H                                                  | 0.00000000  | 0.76273400  | -0.46543500 |           |                                                                                     |         |                                                                                       |
| H                                                  | 0.00000000  | -0.76273400 | -0.46543500 |           |                                                                                     |         |                                                                                       |
| <b>NH<sub>3</sub></b>                              |             |             |             |           |                                                                                     |         |                                                                                       |
| N                                                  | 0.00002600  | 0.00002600  | -0.11246200 | 1034.34   | 1660.37                                                                             | 1661.74 |   |
| H                                                  | -0.56199200 | 0.75354600  | 0.26242100  |           |                                                                                     |         |                                                                                       |
| H                                                  | 0.93368900  | 0.10967600  | 0.26246600  |           |                                                                                     |         |                                                                                       |
| H                                                  | -0.37188100 | -0.86340400 | 0.26234800  |           |                                                                                     |         |                                                                                       |
| <b>HCOOH</b>                                       |             |             |             |           |                                                                                     |         |                                                                                       |
| C                                                  | 0.13498200  | 0.39878300  | -0.00000100 | 645.75    | 676.77                                                                              | 1074.92 |  |
| H                                                  | 0.11130600  | 1.49338900  | 0.00002400  |           |                                                                                     |         |                                                                                       |
| O                                                  | 1.12637700  | -0.26486600 | -0.00007800 |           |                                                                                     |         |                                                                                       |
| O                                                  | -1.11039500 | -0.08900800 | 0.00007000  |           |                                                                                     |         |                                                                                       |
| H                                                  | -1.04905500 | -1.05509200 | 0.00004600  |           |                                                                                     |         |                                                                                       |
| <b>H<sub>2</sub>O<sub>2</sub>...NH<sub>3</sub></b> |             |             |             |           |                                                                                     |         |                                                                                       |
| O                                                  | 0.88714900  | 0.77306500  | 0.00826100  | 60.38     | 96.86                                                                               | 207.80  |  |
| O                                                  | 1.22938000  | -0.60714700 | -0.11079000 |           |                                                                                     |         |                                                                                       |
| H                                                  | -0.09051100 | 0.69895200  | 0.08496800  |           |                                                                                     |         |                                                                                       |
| H                                                  | 1.70982200  | -0.75728200 | 0.70975400  |           |                                                                                     |         |                                                                                       |
| N                                                  | -1.77359500 | -0.05618800 | 0.02027800  |           |                                                                                     |         |                                                                                       |
| H                                                  | -1.41706300 | -0.96824900 | -0.24227100 |           |                                                                                     |         |                                                                                       |
| H                                                  | -2.37903000 | 0.26444400  | -0.72444600 |           |                                                                                     |         |                                                                                       |
| H                                                  | -2.34029500 | -0.17188800 | 0.85028200  |           |                                                                                     |         |                                                                                       |
| H                                                  | 1.63624200  | 0.94099400  | -0.01626700 |           |                                                                                     |         |                                                                                       |
| <b>HO...NH<sub>3</sub></b>                         |             |             |             |           |                                                                                     |         |                                                                                       |
| O                                                  | -1.63607200 | 0.00002000  | 0.00000500  | 205.86    | 215.26                                                                              | 227.96  |  |
| H                                                  | -0.64793100 | 0.00074400  | 0.00002700  |           |                                                                                     |         |                                                                                       |
| N                                                  | 1.26201500  | 0.00029000  | 0.00000700  |           |                                                                                     |         |                                                                                       |
| H                                                  | 1.63291400  | -0.48603000 | -0.80700100 |           |                                                                                     |         |                                                                                       |
| H                                                  | 1.63324700  | -0.45789900 | 0.82315100  |           |                                                                                     |         |                                                                                       |
| H                                                  | 1.63624200  | 0.94099400  | -0.01626700 |           |                                                                                     |         |                                                                                       |
| H                                                  | 1.63624200  | 0.94099400  | -0.01626700 |           |                                                                                     |         |                                                                                       |
| <b>NH<sub>3</sub>...HO</b>                         |             |             |             |           |                                                                                     |         |                                                                                       |
| O                                                  | -1.37047200 | -0.09049300 | -0.00000200 | 129.12    | 161.62                                                                              | 263.61  |  |
| H                                                  | -1.34904800 | 0.88052400  | 0.00022400  |           |                                                                                     |         |                                                                                       |
| N                                                  | 1.32844400  | -0.05387500 | -0.00007700 |           |                                                                                     |         |                                                                                       |
| H                                                  | 0.82538600  | -0.36848200 | 0.81946100  |           |                                                                                     |         |                                                                                       |
| H                                                  | 0.82493000  | -0.36729500 | -0.81978900 |           |                                                                                     |         |                                                                                       |
| H                                                  | 1.36339500  | 0.95632100  | 0.00065300  |           |                                                                                     |         |                                                                                       |
| H                                                  | 1.36339500  | 0.95632100  | 0.00065300  |           |                                                                                     |         |                                                                                       |
| <b>H<sub>2</sub>O<sub>2</sub>...HCOOH</b>          |             |             |             |           |                                                                                     |         |                                                                                       |
| O                                                  | 1.55584000  | 0.69661000  | 0.13281900  | 75.77     | 162.03                                                                              | 189.64  |  |
| O                                                  | 1.73992300  | -0.65781100 | -0.26179400 |           |                                                                                     |         |                                                                                       |
| O                                                  | 0.84669000  | -1.02544900 | -0.09887800 |           |                                                                                     |         |                                                                                       |
| C                                                  | -1.61073800 | -0.12441600 | 0.00431400  |           |                                                                                     |         |                                                                                       |
| H                                                  | -2.70341600 | -0.14075900 | -0.04153800 |           |                                                                                     |         |                                                                                       |
| O                                                  | -0.94617700 | -1.11693300 | 0.17563100  |           |                                                                                     |         |                                                                                       |
| O                                                  | -1.13719200 | 1.09317100  | -0.14785100 |           |                                                                                     |         |                                                                                       |
| H                                                  | -0.15362300 | 1.07050600  | -0.07639500 |           |                                                                                     |         |                                                                                       |
| H                                                  | 1.97562300  | 0.72189500  | 1.00048500  |           |                                                                                     |         |                                                                                       |
| H                                                  | 1.97562300  | 0.72189500  | 1.00048500  |           |                                                                                     |         |                                                                                       |
| <b>H<sub>2</sub>O<sub>2</sub>...HCOOHa</b>         |             |             |             |           |                                                                                     |         |                                                                                       |





|                |             |             |             |          |         |         |  |
|----------------|-------------|-------------|-------------|----------|---------|---------|--|
| O              | 1.24635200  | 0.48811400  | -0.70117900 | 97.49    | 112.91  | 132.80  |  |
| H              | 0.31172100  | 0.61133300  | -0.92047500 | 156.33   | 202.33  | 217.66  |  |
| O              | 1.21177200  | 0.41010700  | 0.71747600  | 224.13   | 342.70  | 395.54  |  |
| O              | -0.35095100 | -1.85278500 | -0.06693400 | 563.03   | 650.82  | 764.52  |  |
| H              | 1.06259900  | -0.53898200 | 0.85042200  | 1040.45  | 1130.49 | 1434.87 |  |
| H              | -0.88842200 | -1.03713100 | -0.20059400 | 1455.63  | 1656.14 | 1669.38 |  |
| N              | -1.68512600 | 0.77471700  | 0.01341100  | 3472.10  | 3491.03 | 3590.98 |  |
| H              | -1.97981800 | 1.50244300  | -0.62699900 | 3611.45  | 3741.58 | 3756.38 |  |
| H              | -1.05324700 | 1.19291400  | 0.69091900  |          |         |         |  |
| H              | -2.51433500 | 0.48292200  | 0.51795500  |          |         |         |  |
| <b>TS_AM1</b>  |             |             |             |          |         |         |  |
| O              | -0.88705500 | -0.89193200 | -0.52434700 | -875.11  | 163.10  | 240.05  |  |
| O              | -1.32321500 | -0.15945700 | 0.56133400  | 270.25   | 306.41  | 364.62  |  |
| H              | -0.17838500 | -1.47136800 | -0.13173500 | 464.21   | 513.67  | 577.92  |  |
| O              | 0.02447500  | 1.61052800  | -0.23243100 | 709.46   | 727.11  | 870.18  |  |
| H              | -0.74098500 | 0.98946300  | 0.28031900  | 1070.61  | 1155.82 | 1222.46 |  |
| H              | 0.79769700  | 1.01977200  | -0.17912000 | 1494.56  | 1684.50 | 1719.38 |  |
| N              | 1.72813600  | -0.43522800 | 0.07095600  | 1756.89  | 3323.65 | 3429.54 |  |
| H              | 1.02716800  | -0.43768600 | 0.80913600  | 3454.33  | 3511.98 | 3596.62 |  |
| H              | 2.59748300  | -0.11407800 | 0.50696000  |          |         |         |  |
| H              | 1.88643400  | -1.41261300 | -0.21869900 |          |         |         |  |
| <b>IMF_AM1</b> |             |             |             |          |         |         |  |
| O              | -1.64897900 | 0.02409200  | 0.02121800  | 43.28    | 99.66   | 142.55  |  |
| H              | -0.89957000 | 0.73221400  | 0.01397300  | 162.74   | 201.14  | 231.46  |  |
| O              | -1.03807100 | -1.12643000 | -0.02088600 | 344.92   | 349.60  | 403.13  |  |
| O              | 1.78508800  | -0.83382000 | -0.00789300 | 565.78   | 601.30  | 1036.63 |  |
| H              | 0.84884700  | -1.09586100 | -0.01713900 | 1187.41  | 1316.61 | 1632.26 |  |
| H              | 2.29633200  | -1.63438500 | 0.11558800  | 1638.64  | 1666.17 | 1701.97 |  |
| N              | 0.40354400  | 1.69249100  | -0.00390400 | 2610.64  | 3449.79 | 3575.71 |  |
| H              | 0.48866500  | 2.23952700  | -0.85167300 | 3623.20  | 3662.27 | 3950.80 |  |
| H              | 1.20709100  | 1.06782900  | 0.04790100  |          |         |         |  |
| H              | 0.44951900  | 2.33250500  | 0.77916200  |          |         |         |  |
| <b>IM_AM2</b>  |             |             |             |          |         |         |  |
| N              | 1.00904500  | 1.44344100  | -0.17217000 | -14.68   | 65.48   | 84.79   |  |
| H              | 1.21073400  | 2.07911300  | 0.59636300  | 144.04   | 168.43  | 321.11  |  |
| H              | 0.00320000  | 1.24394800  | -0.15187900 | 374.52   | 478.17  | 558.85  |  |
| H              | 1.22723200  | 1.94238900  | -1.03546900 | 709.53   | 746.96  | 853.27  |  |
| O              | -1.79398500 | -0.76152700 | -0.51963200 | 1035.78  | 1138.96 | 1470.03 |  |
| H              | -0.82399700 | -0.90028400 | -0.65379400 | 1500.36  | 1662.09 | 1677.91 |  |
| O              | -1.77782000 | 0.23393500  | 0.50412600  | 3199.73  | 3381.83 | 3495.66 |  |
| O              | 2.45658300  | -1.19631400 | 0.15708500  | 3504.90  | 3548.72 | 3620.69 |  |
| H              | 2.00965400  | -0.29981200 | 0.04796900  |          |         |         |  |
| H              | -1.76836000 | -0.37819800 | 1.26937300  |          |         |         |  |
| <b>TS_AM2</b>  |             |             |             |          |         |         |  |
| N              | 1.32621200  | 1.35207400  | -0.09172000 | -41.50   | 52.60   | 70.62   |  |
| H              | 1.54884900  | 1.93228400  | 0.71440000  | 138.35   | 171.43  | 305.10  |  |
| H              | 0.30479800  | 1.33790800  | -0.18314400 | 350.79   | 417.43  | 502.02  |  |
| H              | 1.70557400  | 1.82653800  | -0.91279800 | 558.70   | 582.11  | 911.60  |  |
| O              | -1.39925300 | -0.57600400 | -0.56915900 | 1030.06  | 1140.57 | 1436.16 |  |
| H              | -0.46573600 | -0.67898300 | -0.32544500 | 1561.74  | 1663.82 | 1670.36 |  |
| O              | -1.85365400 | 0.38700000  | 0.38658900  | 3146.26  | 3375.52 | 3384.10 |  |
| O              | 1.68342500  | -1.43549500 | 0.19611300  | 3493.33  | 3550.44 | 3718.41 |  |
| H              | 2.23697500  | -0.60176100 | 0.11175900  |          |         |         |  |
| H              | -2.05809200 | -0.28450700 | 1.12892100  |          |         |         |  |
| <b>IM_AM3</b>  |             |             |             |          |         |         |  |
| O              | -1.38184800 | 0.12501100  | 0.66515600  | 52.65    | 80.59   | 105.11  |  |
| O              | -1.26376900 | -0.66581000 | -0.51324800 | 156.61   | 225.41  | 253.61  |  |
| H              | -0.76265700 | 0.85275500  | 0.45882200  | 277.23   | 284.84  | 369.27  |  |
| H              | -2.09054100 | -0.47560100 | -0.96911400 | 635.77   | 700.14  | 978.54  |  |
| N              | 1.66050500  | -0.91399300 | 0.10871000  | 1041.36  | 1132.41 | 1375.70 |  |
| H              | 0.76269200  | -1.32860900 | -0.12410400 | 1499.76  | 1649.19 | 1662.41 |  |
| H              | 1.86679500  | -1.15462800 | 1.07034100  | 3097.90  | 3480.66 | 3555.53 |  |
| H              | 2.36795300  | -1.34427300 | -0.47302200 | 3596.56  | 3628.42 | 3840.80 |  |
| O              | 0.77008200  | 1.67355900  | -0.22482700 |          |         |         |  |
| H              | 1.23650100  | 0.78622800  | -0.14053900 |          |         |         |  |
| <b>TS_AM3</b>  |             |             |             |          |         |         |  |
| O              | -1.26627500 | 0.06992800  | 0.59502400  | -1912.93 | 45.84   | 105.50  |  |
| O              | -1.16049300 | -0.95649200 | -0.34267400 | 141.63   | 202.68  | 239.29  |  |
| H              | -0.75068900 | 0.89420300  | 0.13759300  | 251.77   | 315.98  | 394.69  |  |
| H              | -1.85573900 | -0.75376200 | -0.98150000 | 525.59   | 830.04  | 971.59  |  |
| N              | 1.88116900  | -0.59150100 | 0.07439500  | 1084.58  | 1110.08 | 1288.73 |  |
| H              | 1.08940400  | -1.21135900 | -0.06543300 | 1376.86  | 1418.46 | 1649.38 |  |
| H              | 2.17941700  | -0.68857700 | 1.03686600  | 1663.06  | 3220.46 | 3486.95 |  |
| H              | 2.63800500  | -0.91083100 | -0.51631900 | 3602.55  | 3631.31 | 3794.75 |  |
| O              | 0.24400700  | 1.61776100  | -0.24332200 |          |         |         |  |
| H              | 0.99351200  | 0.96125500  | -0.20420000 |          |         |         |  |

|                |             |             |             |          |         |         |  |  |
|----------------|-------------|-------------|-------------|----------|---------|---------|--|--|
| <b>IMF_AM3</b> |             |             |             |          |         |         |  |  |
| O              | 1.78508000  | -0.83386600 | -0.00776700 |          |         |         |  |  |
| H              | 0.84882800  | -1.09584600 | -0.01757600 | 44.09    | 100.24  | 142.57  |  |  |
| H              | 2.29613600  | -1.63435400 | 0.11705800  | 163.25   | 201.20  | 231.46  |  |  |
| O              | -1.03811700 | -1.12637700 | -0.02159500 | 344.92   | 349.63  | 403.20  |  |  |
| O              | -1.64896300 | 0.02412600  | 0.02192500  | 565.70   | 601.56  | 1036.59 |  |  |
| H              | -0.89954500 | 0.73223800  | 0.01444200  | 1187.39  | 1316.58 | 1632.29 |  |  |
| N              | 0.40359100  | 1.69245800  | -0.00410000 | 1638.63  | 1666.16 | 1702.02 |  |  |
| H              | 0.44920900  | 2.33370500  | 0.77797600  | 2610.63  | 3449.64 | 3575.68 |  |  |
| H              | 0.48913900  | 2.23815200  | -0.85269300 | 3623.21  | 3662.26 | 3950.69 |  |  |
| H              | 1.20708900  | 1.06783700  | 0.04898600  |          |         |         |  |  |
| <b>IM_AM4</b>  |             |             |             |          |         |         |  |  |
| O              | 0.92862500  | -1.34090100 | -0.23364700 |          |         |         |  |  |
| O              | -0.38560800 | -0.89864900 | 0.16621500  | 39.17    | 91.12   | 128.40  |  |  |
| H              | 1.43334500  | -0.47094100 | -0.14673000 | 143.32   | 165.68  | 275.39  |  |  |
| H              | -0.51365800 | -1.36929200 | 0.99229900  | 280.03   | 376.65  | 453.39  |  |  |
| N              | 1.96939800  | 1.20539600  | 0.03693700  | 616.15   | 709.80  | 973.41  |  |  |
| H              | 1.10819200  | 1.73890800  | -0.09008100 | 1001.60  | 1152.21 | 1345.46 |  |  |
| H              | 2.63379100  | 1.52965800  | -0.66640800 | 1624.16  | 1667.70 | 1672.72 |  |  |
| H              | 2.34306900  | 1.45524100  | 0.94925600  | 3058.08  | 3408.24 | 3417.81 |  |  |
| O              | -2.88604100 | 0.79286900  | -0.08041200 | 3525.91  | 3554.59 | 3896.75 |  |  |
| H              | -2.04632800 | 0.25209300  | -0.11414700 |          |         |         |  |  |
| <b>TS_AM4</b>  |             |             |             |          |         |         |  |  |
| O              | -1.77760200 | -0.42289000 | -0.08748000 |          |         |         |  |  |
| O              | -0.52755900 | -1.09102100 | -0.00093700 | -74.69   | 44.16   | 136.85  |  |  |
| H              | -1.50318600 | 0.51628400  | 0.08266300  | 157.95   | 179.61  | 192.78  |  |  |
| H              | -0.50874100 | -1.37625500 | 0.96853400  | 322.26   | 356.90  | 407.58  |  |  |
| O              | 2.21890600  | -0.62029800 | -0.04634400 | 543.38   | 736.71  | 863.36  |  |  |
| H              | 1.41104600  | -1.18228100 | -0.10315300 | 1051.66  | 1114.47 | 1499.21 |  |  |
| N              | 0.07073800  | 1.84330600  | 0.08013100  | 1540.52  | 1653.00 | 1668.44 |  |  |
| H              | 0.94101700  | 1.41796900  | -0.23619000 | 3235.96  | 3407.43 | 3449.34 |  |  |
| H              | 0.31426100  | 2.70491200  | 0.55614700  | 3560.25  | 3591.64 | 3598.51 |  |  |
| H              | -0.45952700 | 2.08989600  | -0.75082500 |          |         |         |  |  |
| <b>IM_AM4</b>  |             |             |             |          |         |         |  |  |
| N              | 1.25650800  | -1.37014100 | 0.10449500  |          |         |         |  |  |
| H              | 1.54879000  | -1.75138700 | 0.99543300  | 45.85    | 96.23   | 122.21  |  |  |
| H              | 1.69184400  | -0.45777300 | -0.00347200 | 162.59   | 206.08  | 245.72  |  |  |
| H              | 1.62420800  | -1.97584000 | -0.61878900 | 278.26   | 302.55  | 405.18  |  |  |
| O              | -1.39701300 | -0.73067600 | -0.28611700 | 447.24   | 661.86  | 906.76  |  |  |
| H              | -0.46661000 | -1.04087600 | -0.12122600 | 1043.24  | 1136.46 | 1365.24 |  |  |
| O              | -1.32679500 | 0.61882100  | 0.16353400  | 1614.10  | 1653.87 | 1663.09 |  |  |
| O              | 1.26261500  | 1.71106100  | -0.11269900 | 3197.83  | 3479.61 | 3558.14 |  |  |
| H              | 0.31961200  | 1.43296800  | -0.08866300 | 3596.37  | 3625.90 | 3842.05 |  |  |
| H              | -1.82436100 | 0.59024500  | 0.98750400  |          |         |         |  |  |
| <b>TS_AM5</b>  |             |             |             |          |         |         |  |  |
| N              | 1.38678000  | -0.97400100 | 0.11261500  |          |         |         |  |  |
| H              | 1.90910900  | -1.27139400 | 0.92568100  | -1762.73 | 155.55  | 222.28  |  |  |
| H              | 1.49587600  | 0.48898200  | -0.14733500 | 240.79   | 307.04  | 365.47  |  |  |
| H              | 1.71927100  | -1.44796700 | -0.71813600 | 445.74   | 565.68  | 596.92  |  |  |
| O              | -1.03987100 | -0.88956700 | -0.32954400 | 715.79   | 753.93  | 822.53  |  |  |
| H              | 0.27153600  | -1.09318600 | 0.23067500  | 1195.26  | 1242.05 | 1374.30 |  |  |
| O              | -1.35515900 | 0.28228600  | 0.18295700  | 1543.55  | 1558.70 | 1598.18 |  |  |
| O              | 0.73479400  | 1.67542700  | -0.05727500 | 1650.05  | 2081.00 | 3087.05 |  |  |
| H              | -0.07784600 | 1.52000300  | -0.55677200 | 3538.63  | 3643.03 | 3821.43 |  |  |
| H              | -1.74351900 | 0.07640600  | 1.10847600  |          |         |         |  |  |
| <b>IMF_AM5</b> |             |             |             |          |         |         |  |  |
| N              | 1.38678000  | -0.97400100 | 0.11261500  |          |         |         |  |  |
| H              | 1.90910900  | -1.27139400 | 0.92568100  | 69.85    | 124.01  | 137.14  |  |  |
| H              | 1.40554988  | 0.72600159  | 0.35705823  | 175.18   | 243.60  | 255.36  |  |  |
| H              | 1.71927100  | -1.44796700 | -0.71813600 | 286.05   | 337.98  | 381.27  |  |  |
| O              | -1.03987100 | -0.88956700 | -0.32954400 | 577.61   | 848.17  | 926.53  |  |  |
| H              | 0.39093290  | -0.99965973 | -0.06051388 | 1121.96  | 1303.41 | 1628.93 |  |  |
| O              | -1.35515900 | 0.28228600  | 0.18295700  | 1641.30  | 1669.11 | 1676.99 |  |  |
| O              | 0.99423517  | 1.59713616  | 0.43445141  | 3033.20  | 3229.62 | 3469.00 |  |  |
| H              | 0.03635947  | 1.46865649  | 0.43663497  | 3591.88  | 3632.35 | 3930.19 |  |  |
| H              | -2.30979096 | 0.37578268  | 0.03860952  |          |         |         |  |  |
| <b>IM_FA1</b>  |             |             |             |          |         |         |  |  |
| O              | 0.98457400  | -1.15247200 | -0.48798900 |          |         |         |  |  |
| O              | 1.17470300  | -1.04694200 | 0.91651400  | 62.54    | 103.93  | 135.85  |  |  |
| O              | 0.51676300  | -0.37243800 | 1.16287600  | 155.58   | 191.57  | 217.18  |  |  |
| C              | -1.75845700 | 0.38659100  | 0.08974900  | 229.76   | 275.36  | 373.52  |  |  |
| H              | -2.79270600 | 0.74048700  | 0.12072500  | 460.31   | 564.72  | 699.50  |  |  |
| O              | -0.86118500 | 0.94496300  | 0.68879400  | 728.24   | 1020.67 | 1049.55 |  |  |
| O              | -1.62280300 | -0.68072900 | -0.64837800 | 1108.63  | 1287.46 | 1412.02 |  |  |
| H              | -0.66248700 | -0.95449400 | -0.67310400 | 1432.83  | 1450.80 | 1496.28 |  |  |
| H              | 1.48799900  | -0.38541700 | -0.81589500 | 1780.66  | 3119.42 | 3152.72 |  |  |
| H              |             |             |             | 3606.04  | 3651.17 | 3666.69 |  |  |



|                |             |             |             |          |         |         |  |
|----------------|-------------|-------------|-------------|----------|---------|---------|--|
| O              | -1.47013800 | -1.21764300 | 0.23416900  | 10.79    | 47.71   | 57.67   |  |
| O              | -2.45186200 | -0.41906400 | -0.10196200 | 89.09    | 123.89  | 141.37  |  |
| H              | -1.48719200 | 1.52648400  | -0.23468300 | 171.35   | 180.93  | 251.39  |  |
| C              | 2.15213000  | -0.20886400 | 0.01487400  | 367.70   | 390.09  | 487.32  |  |
| H              | 3.22992800  | -0.40670100 | -0.02479300 | 662.36   | 755.09  | 1085.06 |  |
| O              | 1.67007900  | 0.83984200  | 0.34631500  | 1183.74  | 1249.8  | 1345.60 |  |
| O              | 1.45949000  | -1.28897000 | -0.35027100 | 1425.60  | 1459.54 | 1650.24 |  |
| H              | 0.51018900  | -1.07707100 | -0.30233900 | 1827.08  | 3112.57 | 3635.62 |  |
| H              | -1.88172500 | -2.01079700 | 0.62700900  | 3692.63  | 3802.09 | 3899.10 |  |
| O              | -0.86516300 | 2.25710400  | -0.15775300 |          |         |         |  |
| H              | -0.02321800 | 1.85112600  | 0.08156900  |          |         |         |  |
| <b>IM_FA4</b>  |             |             |             |          |         |         |  |
| O              | -1.07885400 | 0.84453900  | 0.25898600  | 35.14    | 68.10   | 80.44   |  |
| O              | -0.33259600 | 1.94294600  | -0.24956300 | 125.00   | 161.25  | 184.44  |  |
| H              | 0.57742000  | 1.58563800  | -0.18303200 | 198.71   | 224.42  | 244.12  |  |
| C              | 1.80124300  | -0.75871200 | -0.00580100 | 350.76   | 377.22  | 671.08  |  |
| H              | 2.64856000  | -1.45000800 | -0.03730300 | 710.73   | 867.12  | 1048.48 |  |
| O              | 1.93677900  | 0.43994700  | 0.02012300  | 1094.60  | 1219.24 | 1357.01 |  |
| O              | 0.65833500  | -1.40725000 | -0.00110300 | 1370.29  | 1418.87 | 1548.77 |  |
| H              | -0.09365300 | -0.77960300 | 0.05199300  | 1811.03  | 3130.98 | 3496.48 |  |
| H              | -1.32983500 | 1.14225700  | 1.14129600  | 3560.28  | 3756.93 | 3823.49 |  |
| O              | -2.41966400 | -1.23083000 | -0.04876200 |          |         |         |  |
| H              | -2.72194700 | -0.66082600 | -0.77560300 |          |         |         |  |
| <b>TS_FA4</b>  |             |             |             |          |         |         |  |
| O              | -1.34914100 | 0.86909900  | 0.08380200  | -65.45   | 38.27   | 101.12  |  |
| O              | -0.60387500 | 2.04113300  | -0.22455800 | 117.20   | 155.81  | 166.98  |  |
| H              | 0.31054700  | 1.73382900  | -0.06035900 | 190.49   | 277.29  | 310.64  |  |
| C              | 1.86930700  | -0.49182100 | 0.03279600  | 666.72   | 690.99  | 781.01  |  |
| H              | 2.87705200  | -0.91274300 | 0.05538700  | 803.35   | 871.27  | 1041.14 |  |
| O              | 1.64683900  | 0.68813800  | 0.16120800  | 1081.02  | 1232.19 | 1366.77 |  |
| O              | 0.95714200  | -1.42136800 | -0.15109800 | 1381.28  | 1424.33 | 1517.56 |  |
| H              | 0.06317000  | -1.00451300 | -0.12789600 | 1806.17  | 3159.67 | 3186.11 |  |
| H              | -1.71253000 | 1.06111100  | 0.95684900  | 3522.36  | 3556.24 | 3814.82 |  |
| O              | -1.98503200 | -1.80506200 | 0.05416800  |          |         |         |  |
| H              | -2.08154700 | -0.90228000 | -0.40894000 |          |         |         |  |
| <b>IM_FA5</b>  |             |             |             |          |         |         |  |
| O              | 1.92026300  | -0.32614000 | 0.71092000  | 31.85    | 73.87   | 112.47  |  |
| O              | 1.61903400  | -0.68803200 | -0.63620500 | 117.42   | 183.70  | 196.47  |  |
| H              | 0.69004200  | -0.98858000 | -0.53735100 | 220.48   | 232.56  | 255.96  |  |
| C              | -1.90973100 | -0.50885500 | 0.10142400  | 458.28   | 627.41  | 697.74  |  |
| H              | -2.91990200 | -0.87189900 | 0.31397100  | 735.23   | 908.00  | 1037.48 |  |
| O              | -1.00345100 | -1.25303100 | -0.18597700 | 1094.84  | 1256.49 | 1348.94 |  |
| O              | -1.84012200 | 0.79610600  | 0.20170900  | 1393.85  | 1425.25 | 1549.64 |  |
| H              | -0.92884200 | 1.13151400  | 0.01425200  | 1806.27  | 3138.62 | 3331.58 |  |
| O              | 0.63293700  | 1.88832400  | -0.27502200 | 3487.16  | 3613.52 | 3854.90 |  |
| H              | 1.32354000  | 1.34716000  | 0.16328900  |          |         |         |  |
| H              | 2.66425800  | -0.90288000 | 0.91390600  |          |         |         |  |
| <b>TS_FA5</b>  |             |             |             |          |         |         |  |
| O              | -2.00179900 | 0.39593500  | 0.03420700  | -1962.88 | -79.16  | 98.27   |  |
| O              | -2.07241200 | -0.89611000 | 0.07974400  | 116.39   | 141.90  | 221.97  |  |
| H              | -0.81069200 | -1.16490500 | 0.01078700  | 336.56   | 384.36  | 444.36  |  |
| C              | 1.67037200  | -0.88797600 | 0.00576000  | 510.47   | 647.78  | 695.90  |  |
| H              | 2.53606100  | -1.58201100 | 0.03511300  | 753.47   | 1073.56 | 1157.16 |  |
| O              | 0.49527700  | -1.30086300 | -0.09052600 | 1240.98  | 1276.83 | 1308.26 |  |
| O              | 2.05920800  | 0.35867200  | 0.04253700  | 1374.71  | 1414.56 | 1502.93 |  |
| H              | 1.03715700  | 1.17571600  | 0.09814400  | 1561.71  | 1683.14 | 1836.66 |  |
| O              | 0.29460100  | 1.97462600  | -0.09425500 | 2992.09  | 3276.32 | 3780.11 |  |
| H              | -0.29284200 | 1.94907900  | 0.67603500  |          |         |         |  |
| H              | -2.71971800 | 0.63790200  | -0.63549900 |          |         |         |  |
| <b>IMF_FA5</b> |             |             |             |          |         |         |  |
| O              | 2.30091400  | -0.30143400 | -0.04076500 | 45.91    | 72.76   | 87.50   |  |
| O              | 1.58445900  | -1.41690700 | -0.04204700 | 135.12   | 150.57  | 168.43  |  |
| H              | -0.36258100 | -1.14908200 | -0.01578500 | 179.42   | 189.61  | 210.72  |  |
| C              | -2.10393800 | -0.35693800 | 0.02593200  | 312.49   | 364.35  | 497.17  |  |
| H              | -3.14487400 | -0.66888600 | 0.16622100  | 669.62   | 805.38  | 1086.07 |  |
| O              | -1.29674600 | -1.41213800 | 0.10803700  | 1185.85  | 1199.23 | 1342.49 |  |
| O              | -1.76877900 | 0.78149400  | -0.17410300 | 1415.32  | 1453.87 | 1657.06 |  |
| H              | -0.20146500 | 2.01011900  | 0.01304700  | 1811.61  | 3126.12 | 3589.66 |  |
| O              | 0.65826700  | 2.44037500  | 0.11952600  | 1616.43  | 1789.37 | 3912.61 |  |
| H              | 1.28423000  | 1.79559900  | -0.22155400 |          |         |         |  |
| H              | 3.22340200  | -0.57724700 | 0.13731100  |          |         |         |  |
